# Supplementary material for: CuO–Ni(OH)2 heterostructure nanosheets: a high-performance electrocatalyst for 5-hydroxymethylfurfural oxidation
Source: Royal Society of Chemistry journal article supplement (doi:10.1039/d4cc00366g), 2024-01-01
Supplement: d4cc00366g1.pdf [file d4cc00366g1.pdf]

## **Electronic Supplementary Information (ESI)**

### **CuO-Ni(OH)<sub>2</sub> heterostructure nanosheets: a high-performance electrocatalyst for 5-hydroxymethylfurfural oxidation**

Wenke Wang,<sup>a</sup> Hui Xu,<sup>a</sup> Ting Sang,<sup>a</sup> Dongfang Ji,<sup>a</sup> Jingcheng Hao,<sup>a</sup> Zhonghao Li<sup>\*a</sup>

<sup>a</sup> Key Laboratory of Colloid and Interface Chemistry, Ministry of Education,

Shandong University, Jinan, 250100, China, E-mail: zhonghaoli@sdu.edu.cn

## **Experimental Section**

### **Materials and Chemicals**

Choline chloride (ChCl), oxalic acid ( $\text{H}_2\text{C}_2\text{O}_4$ ), potassium chloride (KCl), copper acetylacetonate ( $\text{C}_{10}\text{H}_{14}\text{CuO}_4$ ) were all obtained from Aladdin Chemistry Co., Ltd. Potassium hydroxide (KOH) and nickel chloride hexahydrate ( $\text{NiCl}_2 \cdot 6\text{H}_2\text{O}$ ) were purchased from Sinopharm Chemical Reagent Co., Ltd. 5-hydroxymethylfurfural (HMF), 2,5-furandicarboxylic acid (FDCA), 5-formyl furan-2-carboxylic acid (FFCA) and 5-hydroxymethyl-2-furan-carboxylic acid (HMFCFA) were purchased from Alfa-Aesar. 2,5-diformyl furan (DFF) was purchased from Tokyo Chemical Industry Co., Ltd. 5 wt% nafion solution was purchased from the Sigma Co., Ltd. Carbon cloth was obtained from Changsha Lyrun Material Co., Ltd. Nafion 115 membrane was purchased from Wuhan GaossUnion technology Co., Ltd.

### **Fabrication of choline chloride/oxalic acid (ChCl/OA) DES**

The deep eutectic solvent (DES) was obtained following the procedures described in the literature.<sup>1</sup> To achieve the (ChCl/OA) DES, equimolar amounts of choline chloride and oxalic acid were magnetically stirred at 80 °C for 30 minutes.

### **Synthesis of CuO-Ni(OH)<sub>2</sub> Heterostructure Nanosheets**

CuO-Ni(OH)<sub>2</sub> products with different initial Cu and Ni ratios were designated as CuO-Ni(OH)<sub>2</sub> (x:y), where x:y is the Cu/Ni atomic ratio of the initial feed. For the synthesis of the CuO-Ni(OH)<sub>2</sub> (1:3) product, a typical procedure involved dissolving 10.7 mg of  $\text{C}_{10}\text{H}_{14}\text{CuO}_4$  and 29.3 mg of  $\text{NiCl}_2 \cdot 6\text{H}_2\text{O}$  in 1 mL of ChCl/OA DES. The mixture was then ultrasonicated at 60 °C until a well-dispersed yellow solution was

obtained. The Cu/Ni-based precursor was generated by microwave heating the solution for 15 s at 100 W. The precursor was subsequently collected, washed multiple times with ethanol, and dried under vacuum at room temperature for 8 h. Next, 150 mg of the dried Cu/Ni-based precursor was refluxed with 15 mL of 2 M KOH at 100 °C for 5 h. After reaction, the product was obtained through centrifugation, and the achieved CuO-Ni(OH)<sub>2</sub> nanosheets were washed with water and ethanol before being dried overnight in a vacuum drying oven.

For comparison, CuO-Ni(OH)<sub>2</sub> (1:2) and CuO-Ni(OH)<sub>2</sub> (1:4) products were synthesized using the same method, where the 1 mL of ChCl/OA DES was used. However, there were differences in the amounts of C<sub>10</sub>H<sub>14</sub>CuO<sub>4</sub> and NiCl<sub>2</sub>·6H<sub>2</sub>O used for each synthesis. For CuO-Ni(OH)<sub>2</sub> (1:2), 14.2 mg of C<sub>10</sub>H<sub>14</sub>CuO<sub>4</sub> and 25.8 mg of NiCl<sub>2</sub>·6H<sub>2</sub>O were used. On the other hand, CuO-Ni(OH)<sub>2</sub> (1:4) was synthesized using 8.6 mg of C<sub>10</sub>H<sub>14</sub>CuO<sub>4</sub> and 31.4 mg of NiCl<sub>2</sub>·6H<sub>2</sub>O. Additionally, CuO product was synthesized without the addition of NiCl<sub>2</sub>·6H<sub>2</sub>O, while Ni(OH)<sub>2</sub> product was synthesized without the addition of C<sub>10</sub>H<sub>14</sub>CuO<sub>4</sub>.

### **Characterizations**

The X-ray diffraction (XRD) patterns were obtained using the Rigaku SmartLab 9KW X-ray diffractometer. Transmission electron microscopy (TEM) was performed on a JEM1400 microscope. Scanning electron microscopy (SEM) and energy-dispersive X-ray (EDX) characterization were conducted with the Zeiss Sigma 300 instrument. High-resolution transmission electron microscopy (HRTEM) images were acquired using the JEM-2100 microscope. High-angle annular dark field (HAADF)-scanning transmission

electron microscopy (STEM) and energy-dispersive X-ray (EDX) were tested on the FEI Titan G2 60-300. X-ray photoelectron spectroscopy (XPS) measurements were performed by a Thermo Fisher ESCALAB XI. Nitrogen adsorption-desorption tests were conducted on the micromeritics ASAP 2460. High performance liquid chromatography (HPLC) analysis was performed using an Agilent G7114A system.

### **Electrochemical Measurements**

The electrochemical characterizations were conducted using a CHI760E workstation. The setup included a working electrode consisting of a catalyst loaded with carbon paper, a counter electrode made of platinum foil, and a reference electrode utilizing saturated Ag/AgCl. The electrolyte used was a 1 M KOH solution, either with or without addition of 10 mM HMF, and the volume of the electrolyte was 10 mL.

To prepare the catalyst ink, a mixture was made by adding 4 mg of catalyst to a solution containing Nafion (20  $\mu$ L, 5 wt%), ethanol (120  $\mu$ L), and water (100  $\mu$ L). This mixture was then sonicated for 25 min to achieve a suspension of the catalyst. The resulting catalyst ink was coated on the carbon paper (1  $\times$  1 cm<sup>2</sup>), serving as working electrode. The catalyst on the electrode was 4 mg cm<sup>-2</sup>.

Linear scanning voltammetry (LSV) was conducted at 10 mV s<sup>-1</sup> within 1-2 V potential range. Electrochemical impedance spectroscopy (EIS) characterization was conducted using frequencies ranging from 1 Hz to 100 kHz. The capacitance (Cdl) was determined utilizing cyclic voltammetry (CV). All of the potentials were normalized to reversible hydrogen electrode (RHE) by the following equation:

$$E (\text{RHE}) = E (\text{Ag/AgCl}) + 0.197 + 0.059 \times \text{pH} \quad (1)$$

## Products analysis

During the chronocurrent analysis at 1.48 V, a volume of 10  $\mu\text{L}$  of electrolyte was extracted and diluted by ultrapure water to 500  $\mu\text{L}$  for subsequent HPLC analysis. The UV-Vis detector utilized a wavelength of 265 nm. The HPLC mobile phase consisted of a mixture of 5 mM aqueous ammonium formate and methanol. Separation and quantification were carried out by isocratic elution with 5 mM aqueous ammonium formate (70% volume) and methanol (30% volume) at 0.6  $\text{mL min}^{-1}$ .

HMF conversion, FDCA yield and Faradaic efficiency (FE) were achieved according to below equations:

$$\text{HMF conversion (\%)} = [n(\text{HMF consumed}) / n(\text{HMF initial})] \times 100 \quad (2)$$

$$\text{FDCA yield (\%)} = [n(\text{FDCA formed}) / n(\text{HMF initial})] \times 100 \quad (3)$$

$$\text{Faradaic efficiency (\%)} = [n(\text{FDCA formed}) / (Q / (6 \times F))] \times 100 \quad (4)$$

where  $Q$  is the total passed charge,  $F$  is 96485  $\text{C mol}^{-1}$  and  $n$  represents the number of moles of reactant, which is determined by calculating the concentration measured using HPLC.

## Density functional theory (DFT) Calculation

Our spin-polarized density functional theory (DFT) calculations<sup>2,3</sup> were carried out in the the CP2K code.<sup>4</sup> All calculations employed a mixed Gaussian and planewave basis sets. Core electrons were represented with norm-conserving Goedecker-Teter-Hutter pseudopotentials,<sup>5-7</sup> and the valence electron wavefunction was expanded in a double-zeta basis set with polarization functions<sup>8</sup> along with an auxiliary plane wave basis set with an energy cutoff of 400 eV. The generalized gradient approximation

exchange-correlation functional of Perdew, Burke, and Enzerhof (PBE)<sup>9</sup> was used. Each configuration was optimized with the Broyden-Fletcher-Goldfarb-Shanno (BGFS) algorithm with SCF convergence criteria of  $1.0 \times 10^{-6}$  a.u. The van der Waals correction of Grimme's DFT-D3 model was also adopted.<sup>10</sup>

The adsorption energy between the HMF and the Ni(OH)<sub>2</sub> or Ni(OH)<sub>2</sub>-CuO can be calculated using the following equation:

$$\Delta E_{ads} = E_{\text{HMF@Ni(OH)}_2/\text{HMF@Ni(OH)}_2\text{-CuO}} - E_{\text{Ni(OH)}_2/\text{Ni(OH)}_2\text{-CuO}} - E_{\text{HMF}} \quad (\text{S1})$$

In Eq. (S1),  $E_{\text{HMF@Ni(OH)}_2/\text{HMF@Ni(OH)}_2\text{-CuO}}$  and  $E_{\text{Ni(OH)}_2/\text{Ni(OH)}_2\text{-CuO}}$  represent the total energies of the the Ni(OH)<sub>2</sub> or Ni(OH)<sub>2</sub>-CuO with and without the adsorption of adsorbate HMF, respectively.  $E_{\text{HMF}}$  is the total energy of the adsorbate HMF.

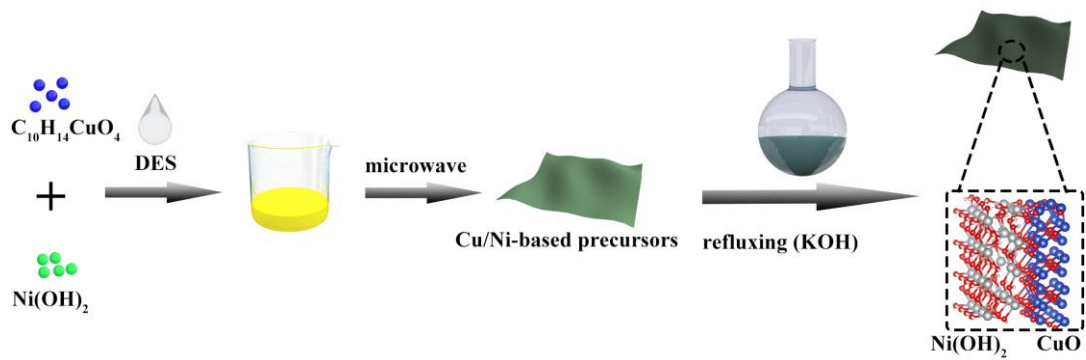

**Fig. S1** Schematic diagram of CuO-Ni(OH)<sub>2</sub> nanosheet synthesis.

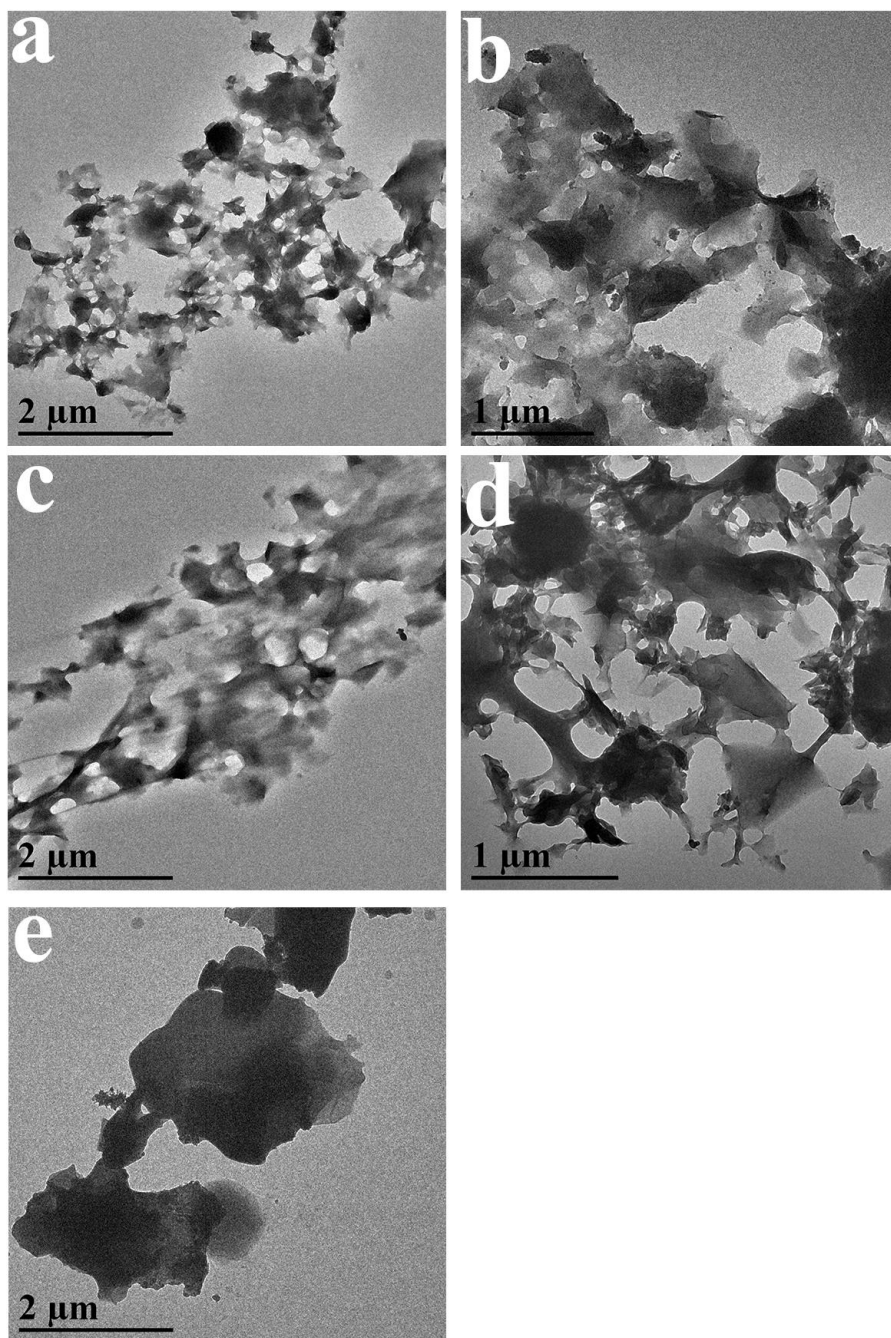

**Fig. S2** TEM images of the precursors obtained after microwave heating 1 mL ChCl/OA DES with the presence of  $C_{10}H_{14}CuO_4$  and  $NiCl_2 \cdot 6H_2O$ . (a) Ni precursor, (b) Cu/Ni precursor obtained with the initial mole ratio of Cu/Ni=1:2, (c) Cu/Ni precursor obtained with the initial mole ratio of Cu/Ni=1:3, (d) Cu/Ni precursor obtained with the initial mole ratio of Cu/Ni=1:4, (e) Cu precursor. The obtained precursors will be used for synthesizing  $Ni(OH)_2$ ,  $CuO-Ni(OH)_2$  (x:y) and  $CuO$ .



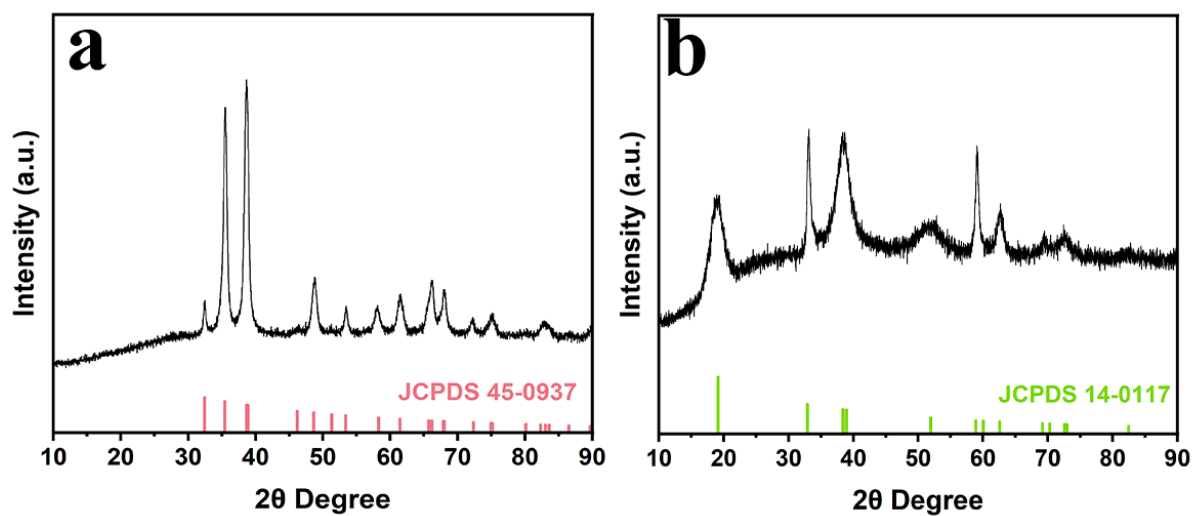

**Fig. S3** XRD pattern of the synthesized (a) CuO, (b) Ni(OH)<sub>2</sub>.

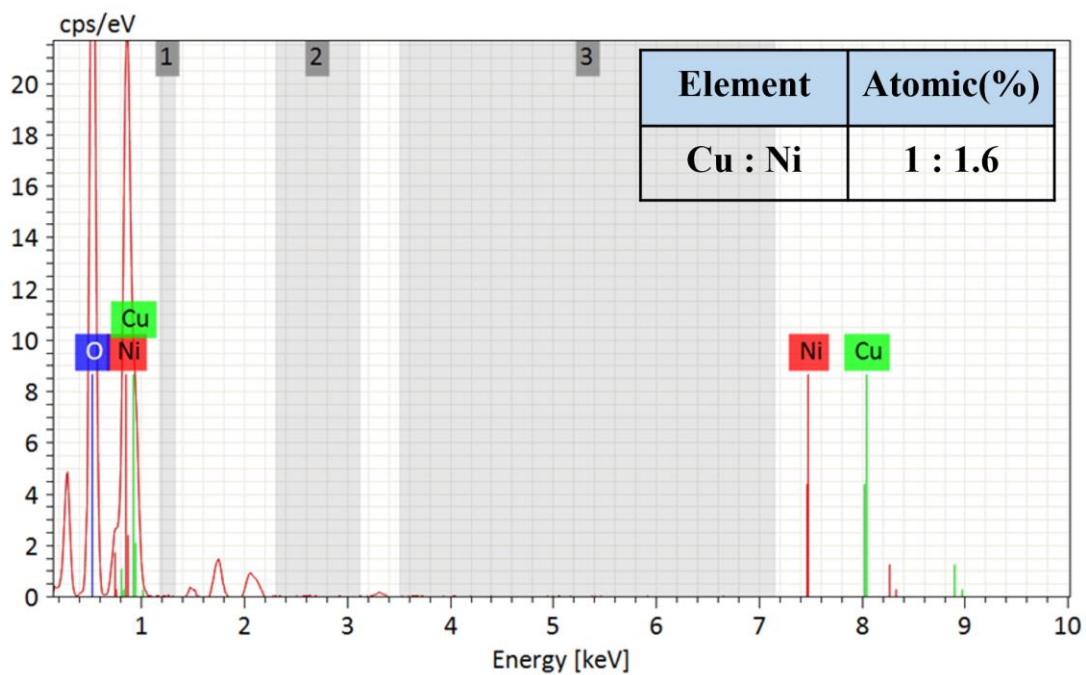

**Fig. S4** EDX spectrum of CuO-Ni(OH)<sub>2</sub> (1:2) which was synthesized from the precursor obtained after microwave heating 1 mL ChCl/OA DES with 14.2 mg C<sub>10</sub>H<sub>14</sub>CuO<sub>4</sub> and 25.8 mg and NiCl<sub>2</sub>·6H<sub>2</sub>O.

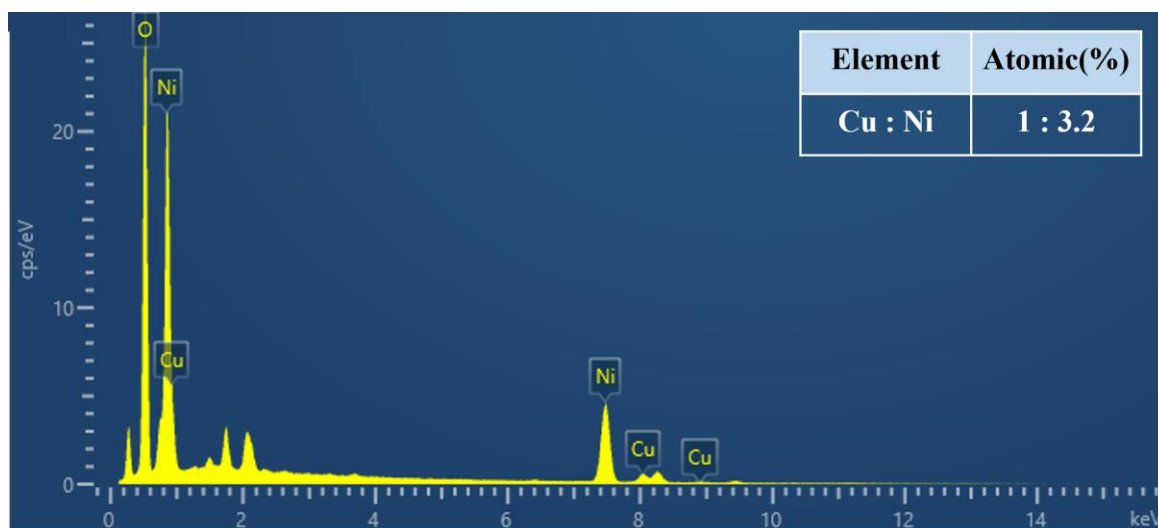

**Fig. S5** EDX spectrum of  $\text{CuO-Ni(OH)}_2$  (1:3) which was synthesized from the precursor obtained after microwave heating 1 mL  $\text{ChCl/OA}$  DES with 10.7 mg  $\text{C}_{10}\text{H}_{14}\text{CuO}_4$  and 29.3 mg and  $\text{NiCl}_2 \cdot 6\text{H}_2\text{O}$ .

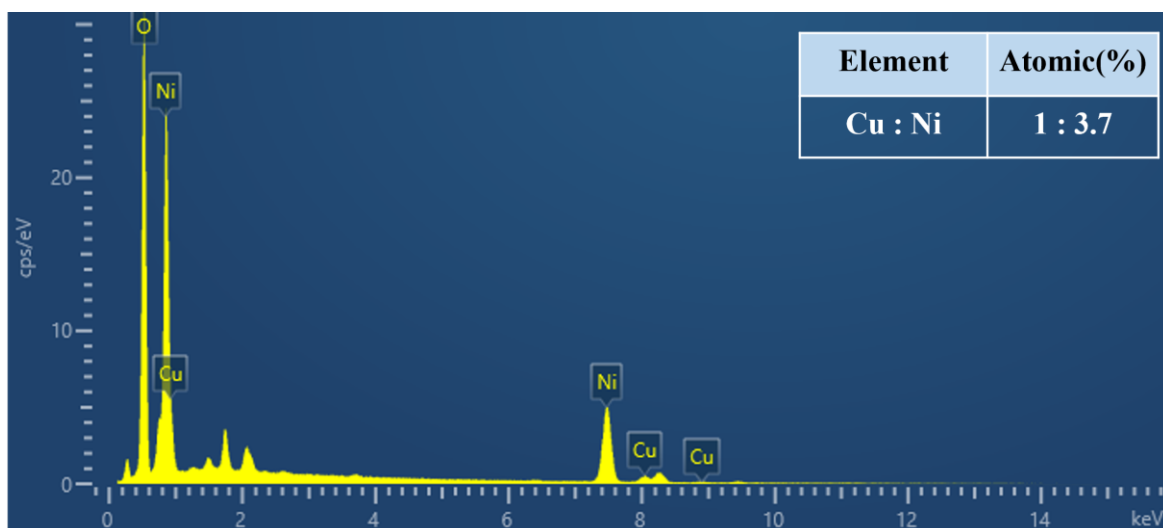

**Fig. S6** EDX spectrum of CuO-Ni(OH)<sub>2</sub> (1:4) which was synthesized from the precursor obtained after microwave heating 1 mL ChCl/OA DES with 8.6 mg C<sub>10</sub>H<sub>14</sub>CuO<sub>4</sub> and 31.4 mg and NiCl<sub>2</sub>·6H<sub>2</sub>O.

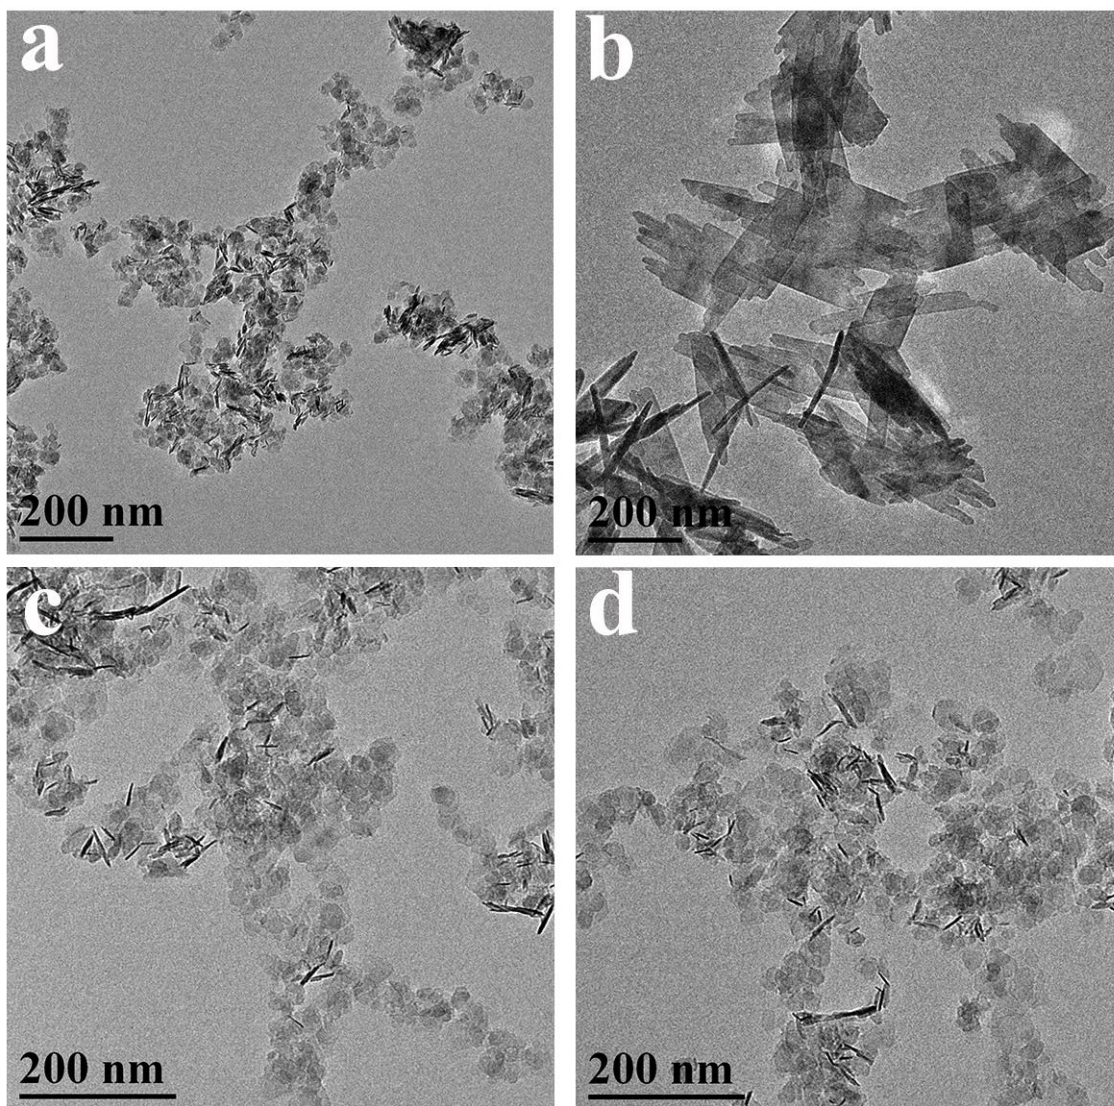

**Fig. S7** TEM images of the synthesized (a) Ni(OH)<sub>2</sub>, (b) CuO, (c) CuO-Ni(OH)<sub>2</sub> (1:2), (d) CuO-Ni(OH)<sub>2</sub> (1:4).

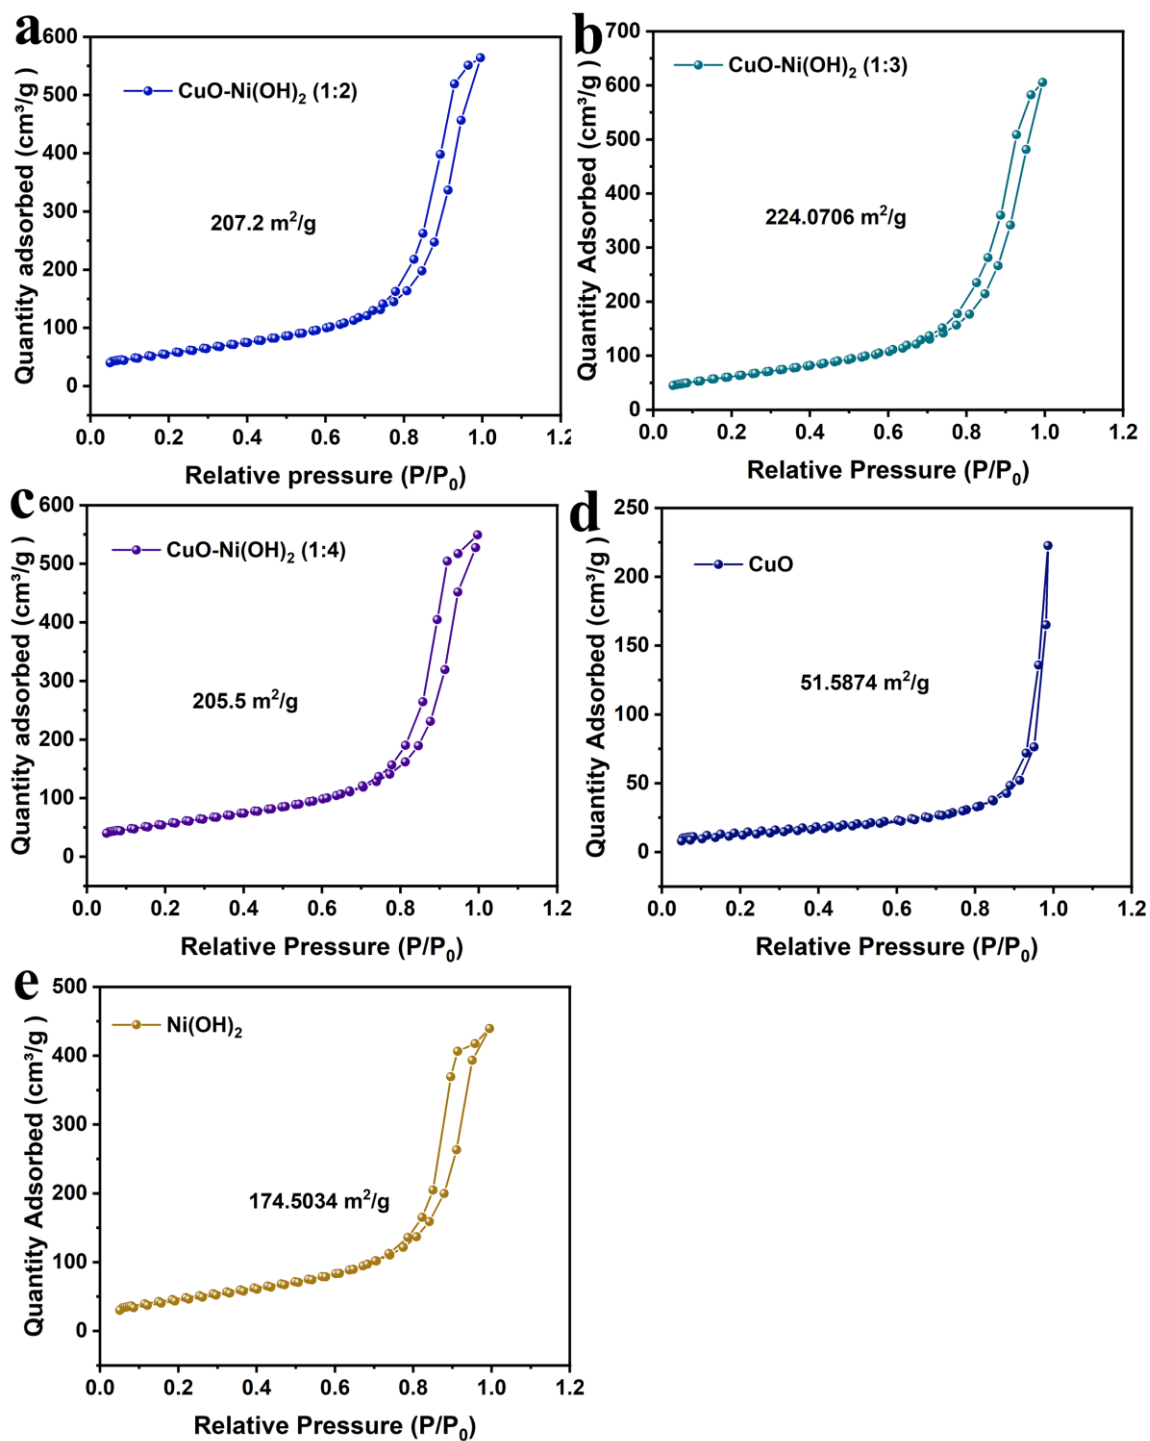

**Fig. S8** N<sub>2</sub> adsorption-desorption isotherms of (a) CuO-Ni(OH)<sub>2</sub> (1:2), (b) CuO-Ni(OH)<sub>2</sub> (1:3), (c) CuO-Ni(OH)<sub>2</sub> (1:4), (d) CuO (e) Ni(OH)<sub>2</sub>.

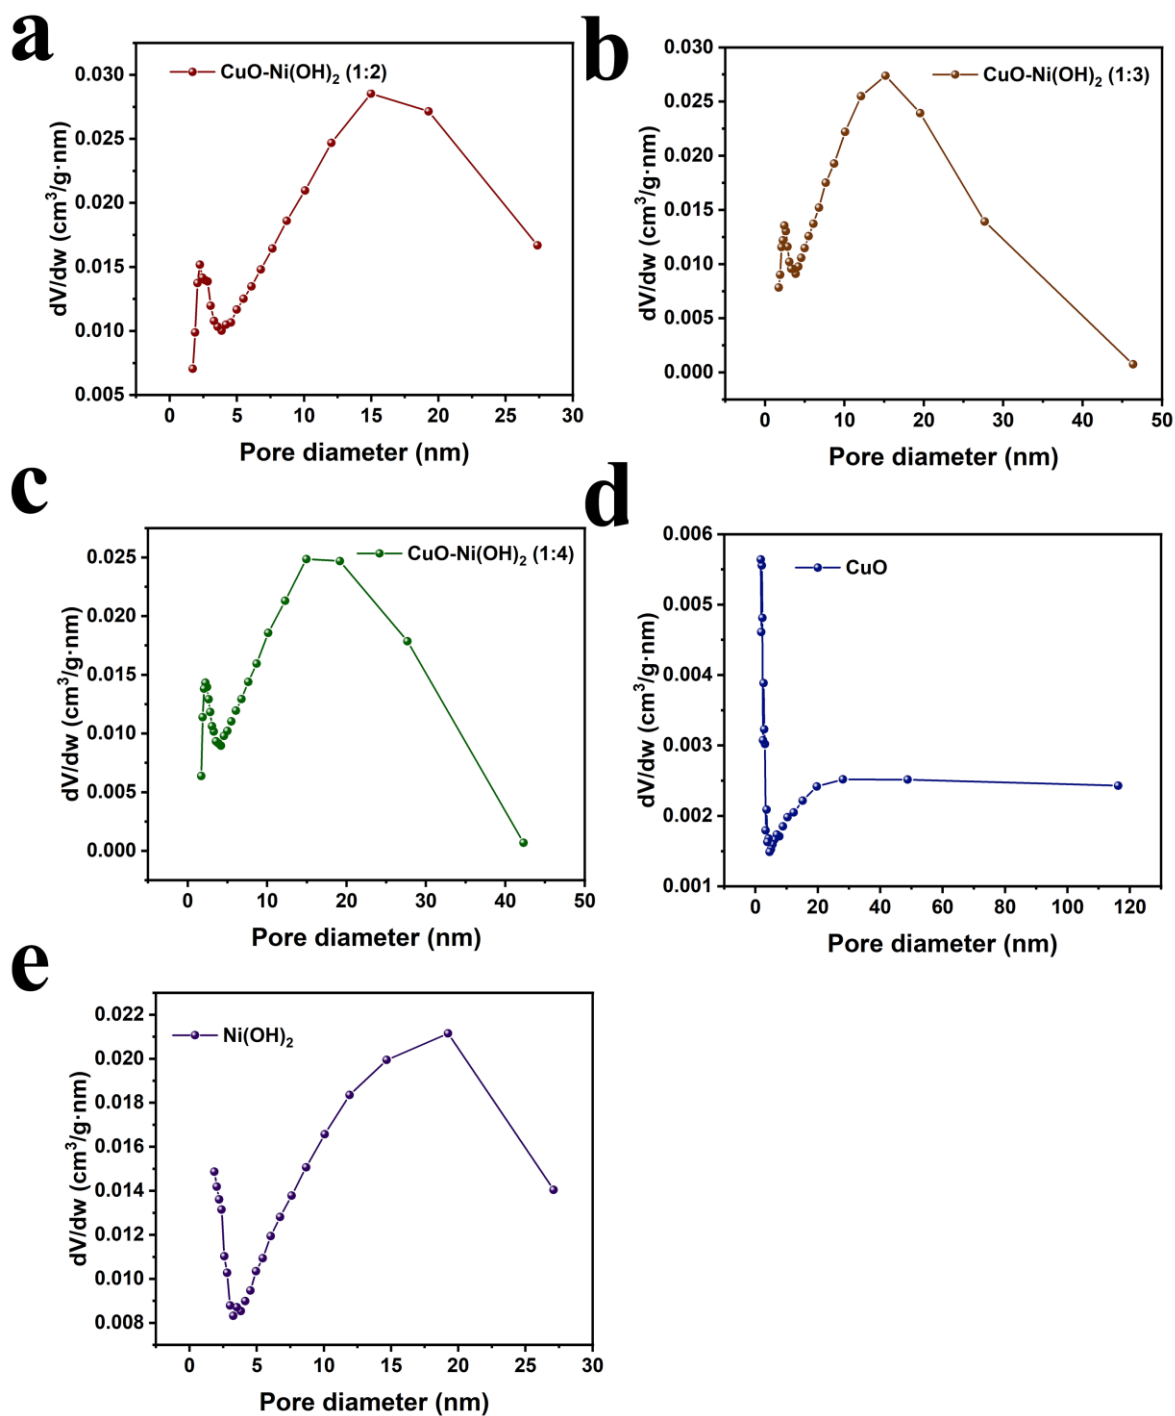

**Fig. S9** Pore size distributions of the synthesized (a) CuO-Ni(OH)<sub>2</sub> (1:2), (b) CuO-Ni(OH)<sub>2</sub> (1:3), (c) CuO-Ni(OH)<sub>2</sub> (1:4), (d) CuO, (e) Ni(OH)<sub>2</sub>.

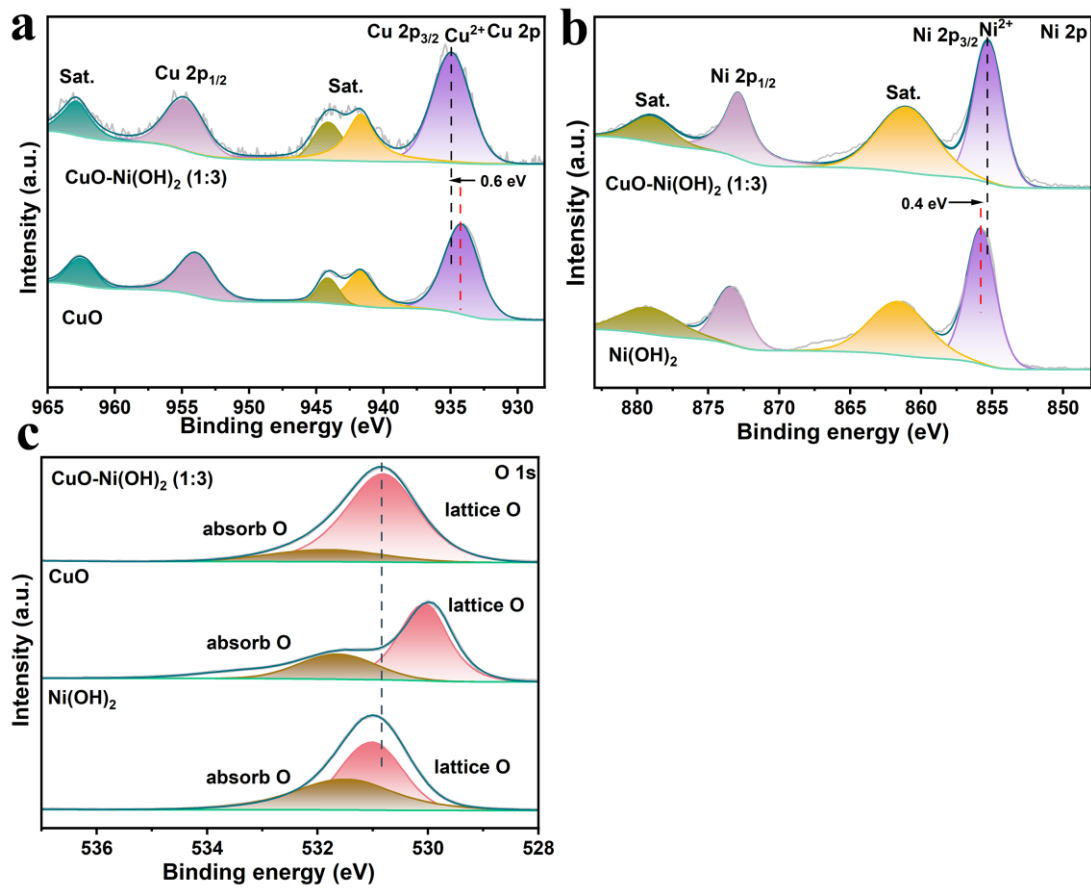

**Fig. S10** High-resolution XPS spectra for CuO-Ni(OH)<sub>2</sub> (1:3): (a) Cu 2p, (b) Ni 2p and (c) O 1s.



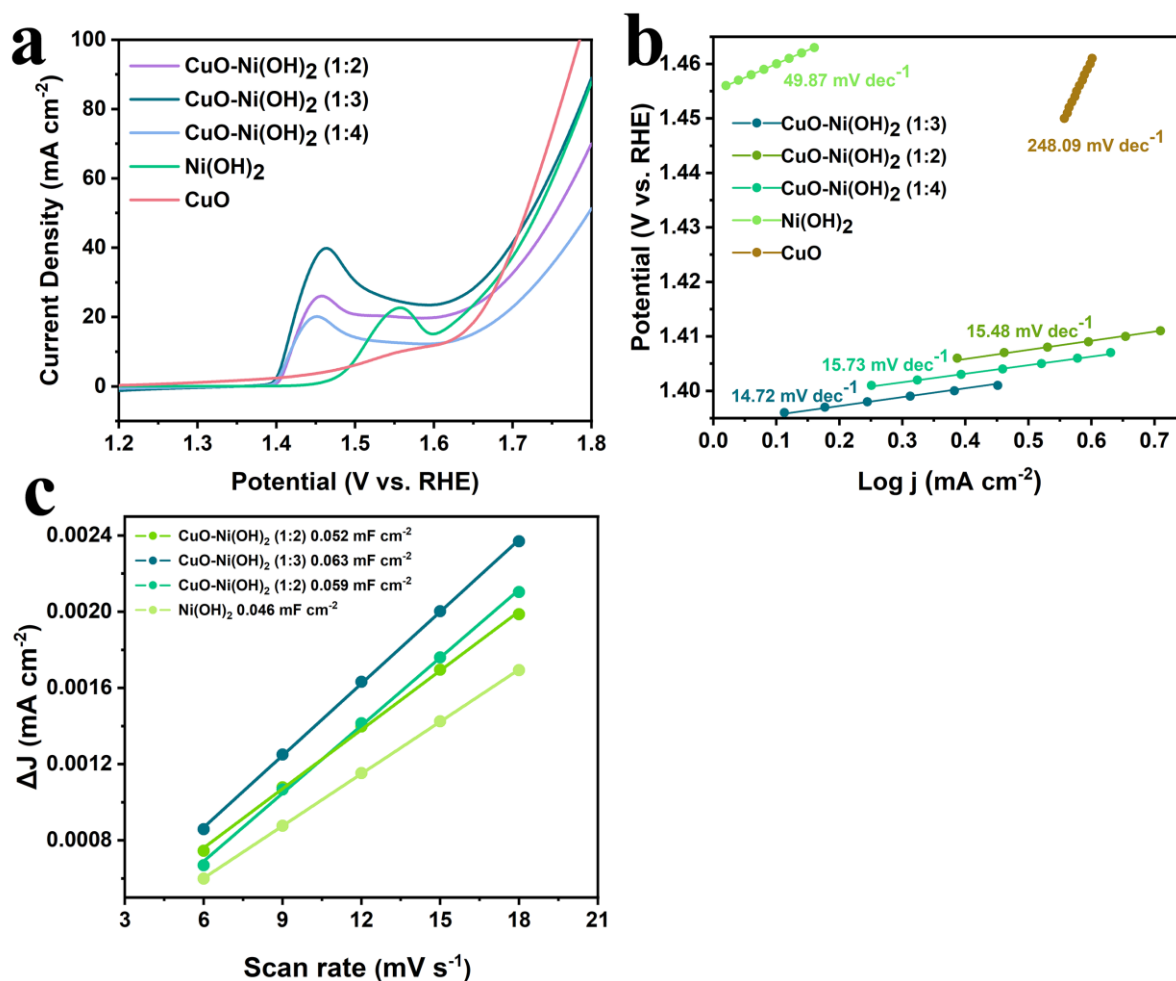

**Fig. S11** (a) LSV curves (b) Tafel plots, and (c) electrochemical double layer capacitance ( $C_{dl}$ ) of Ni(OH)<sub>2</sub>, CuO-Ni(OH)<sub>2</sub> (1:2), CuO-Ni(OH)<sub>2</sub> (1:3) and CuO-Ni(OH)<sub>2</sub> (1:4) in 1.0 M KOH solution with 10 mM HMF.

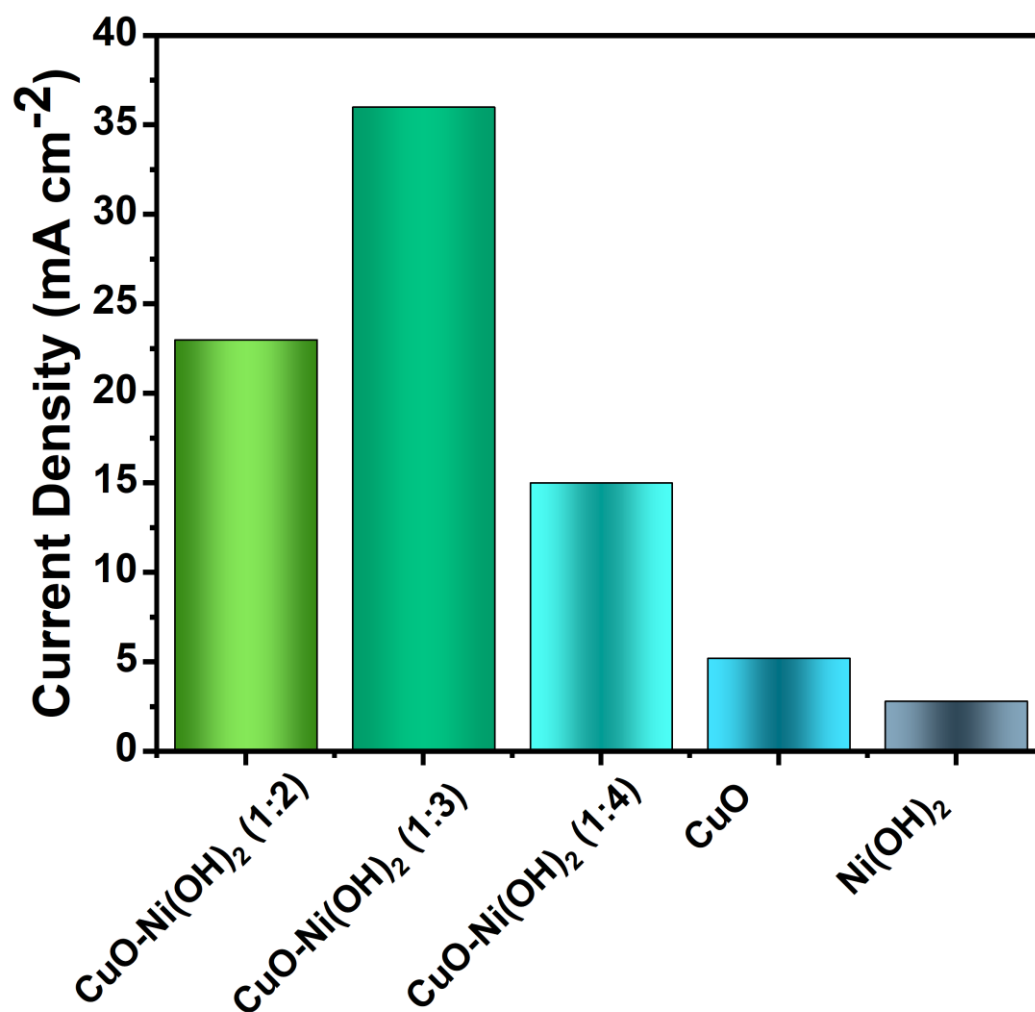

Fig. S12 Corresponding current densities at 1.48 V in 1 M KOH with 10 mM HMF.

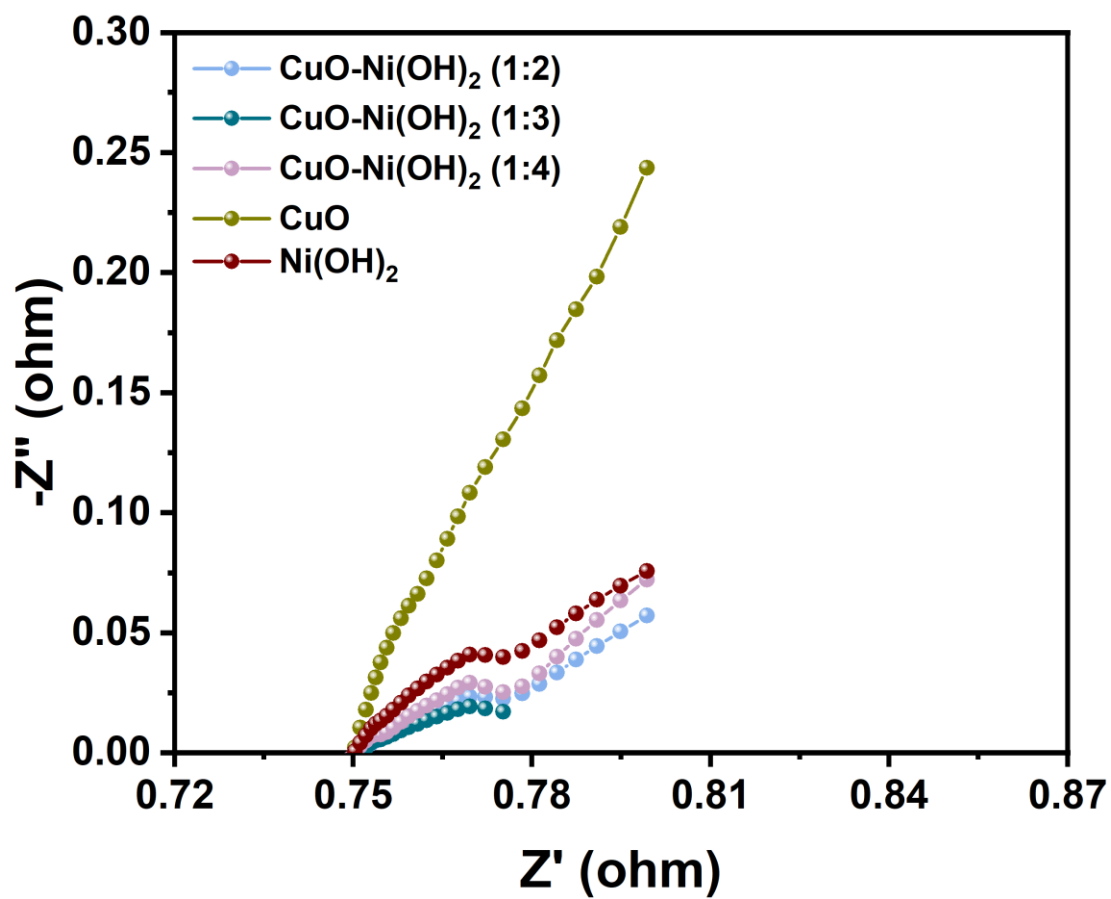

Fig. S13 Electrochemical impedance spectra of different catalysts at 1.48 V.

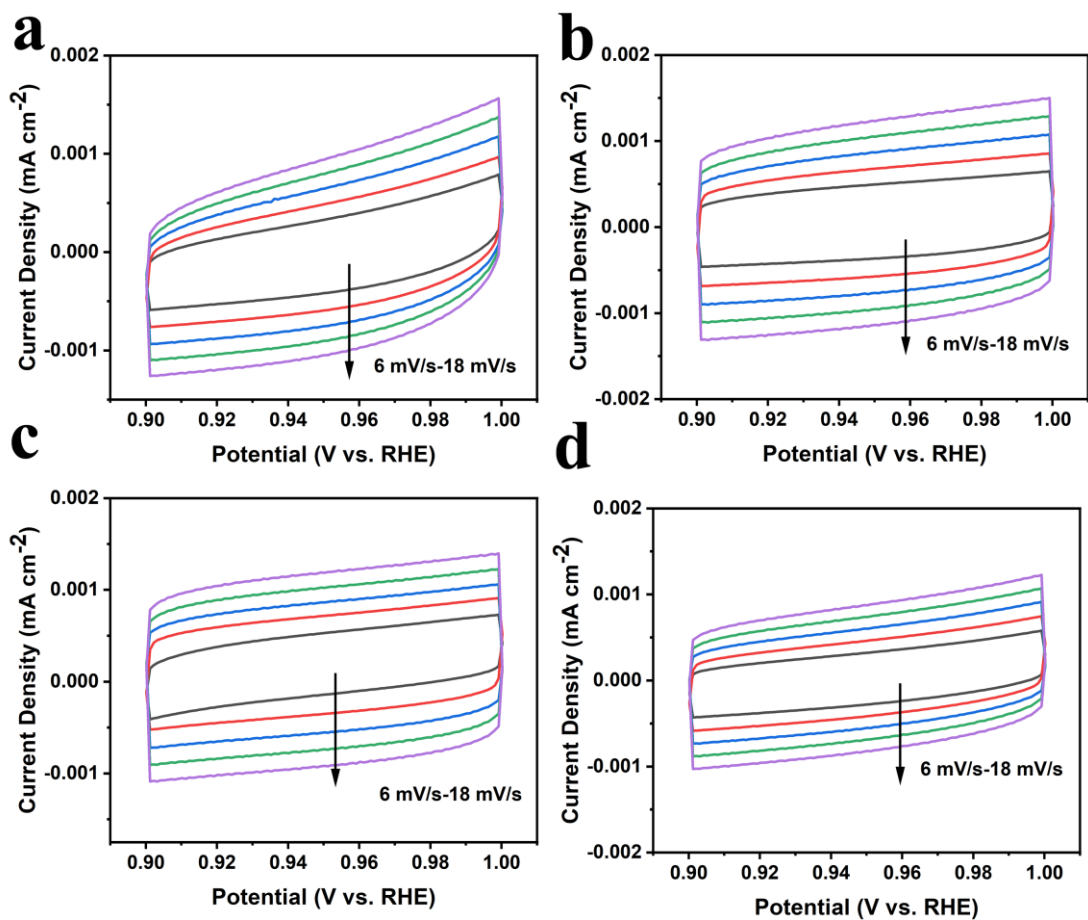

**Fig. S14** Cyclic voltammograms of (a) CuO-Ni(OH)<sub>2</sub> (1:2), (b) CuO-Ni(OH)<sub>2</sub> (1:3), (c) CuO-Ni(OH)<sub>2</sub> (1:4), and (d) Ni(OH)<sub>2</sub> at different scan rates from 0.9 to 1 V vs. RHE.

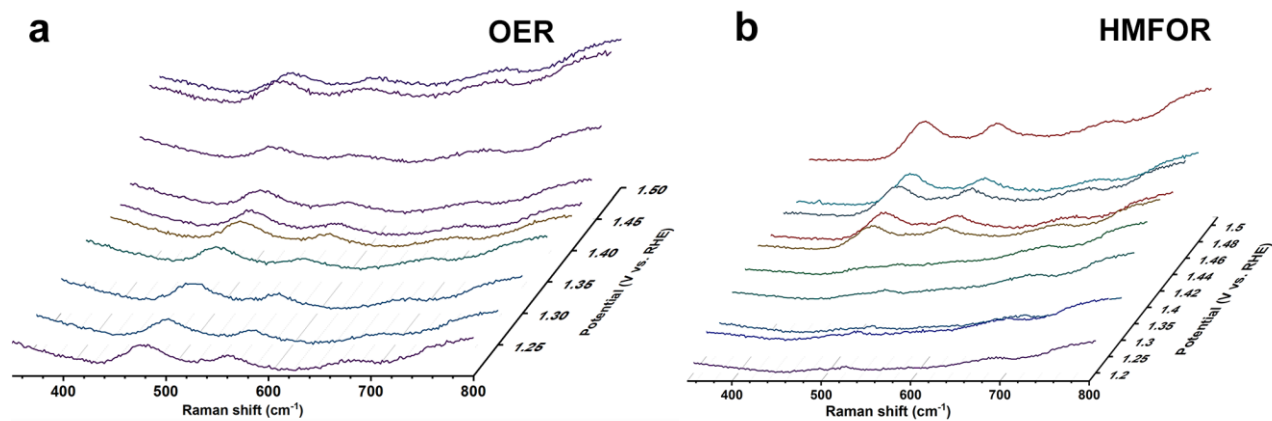

**Fig. S15** In situ Raman spectra of CuO-Ni(OH)<sub>2</sub> for the OER (a), HMFOR(b).

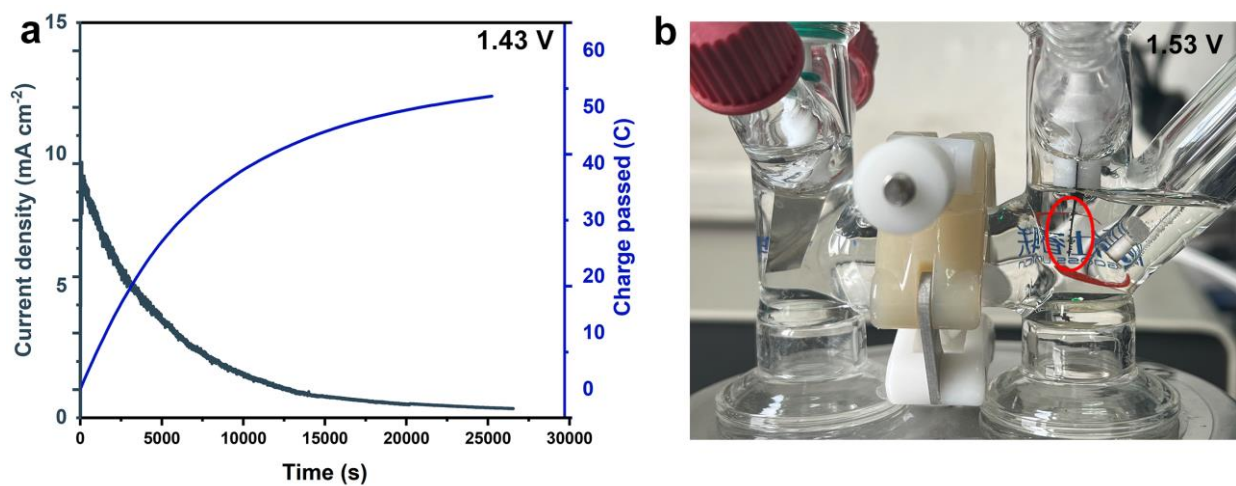

**Fig. S16** (a) Corresponding current change and the accumulated charges over time of the chronoamperometry test of CuO-Ni(OH)<sub>2</sub> (1:3) at 1.43 V (b) the formed visible oxygen in the electrode at 1.53 V.

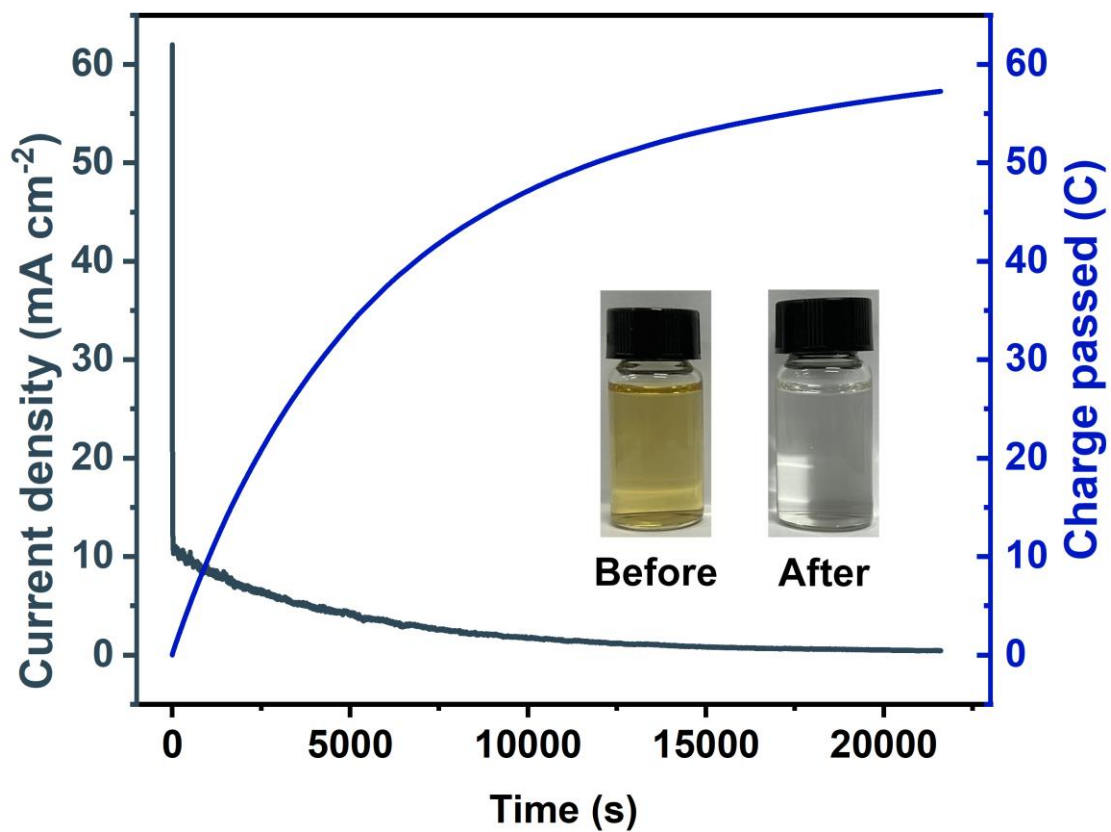

**Fig. S17** Corresponding current change and the accumulated charges over time of the chronoamperometry test of CuO-Ni(OH)<sub>2</sub> (1:3) at 1.48 V in 1.0 M KOH solution with 10 mM HMF (insets: color change of the electrolyte before and after electrolysis).

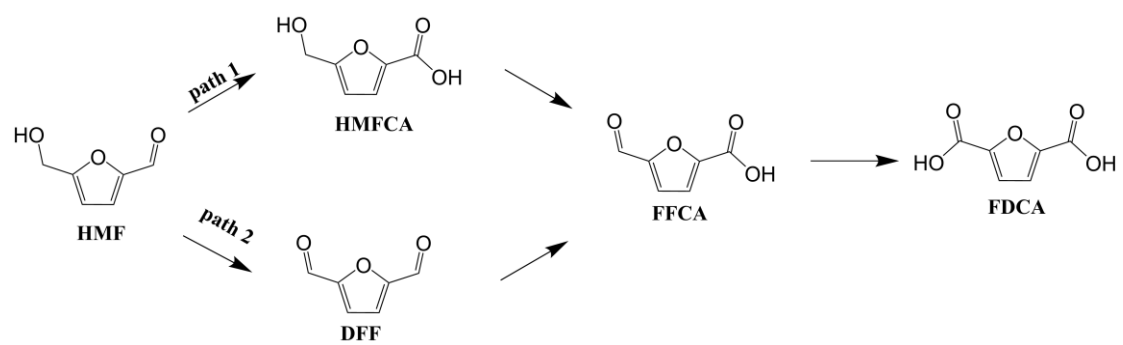

**Fig. S18** Possible pathways for the oxidation of HMF to FDCA.



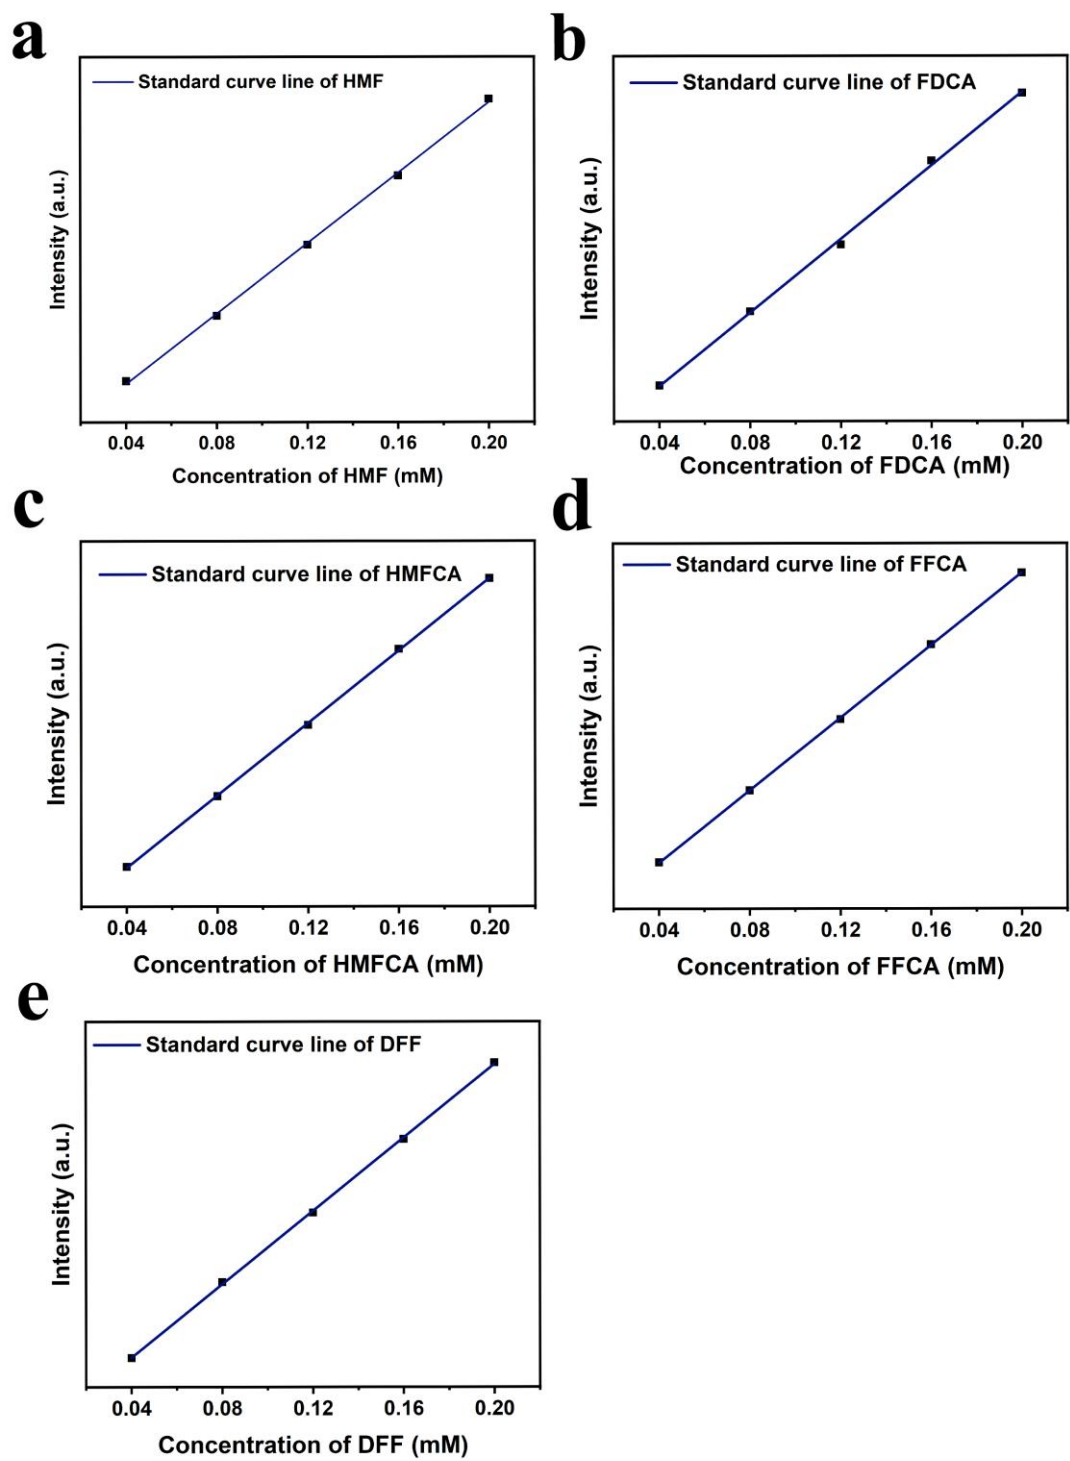

**Fig. S19** Standard curves of the HPLC for (a) HMF, (b) FDCA, (c) HMFCA, (d) FFCA and (e) DFF.

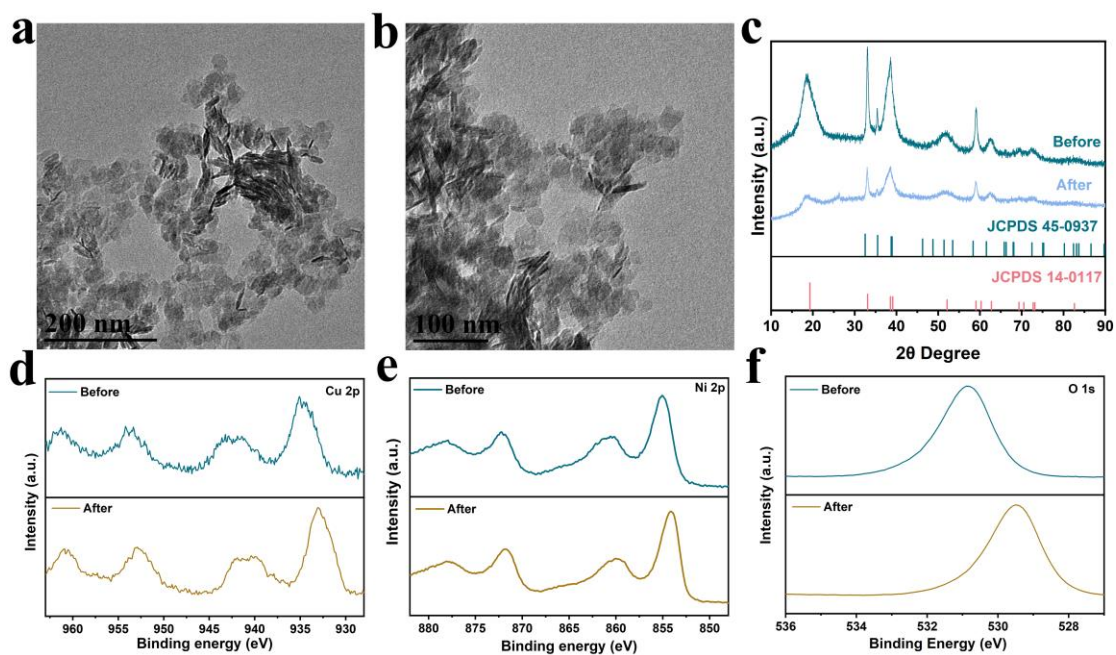

**Fig. S20** (a, b) TEM images of CuO-Ni(OH)<sub>2</sub> (1:3) after five electrolysis cycles. (c) XRD patterns, XPS spectra of (d) Cu 2p, (e) Ni 2p, (f) O 1s of CuO-Ni(OH)<sub>2</sub> (1:3) before and after five electrolysis cycles.

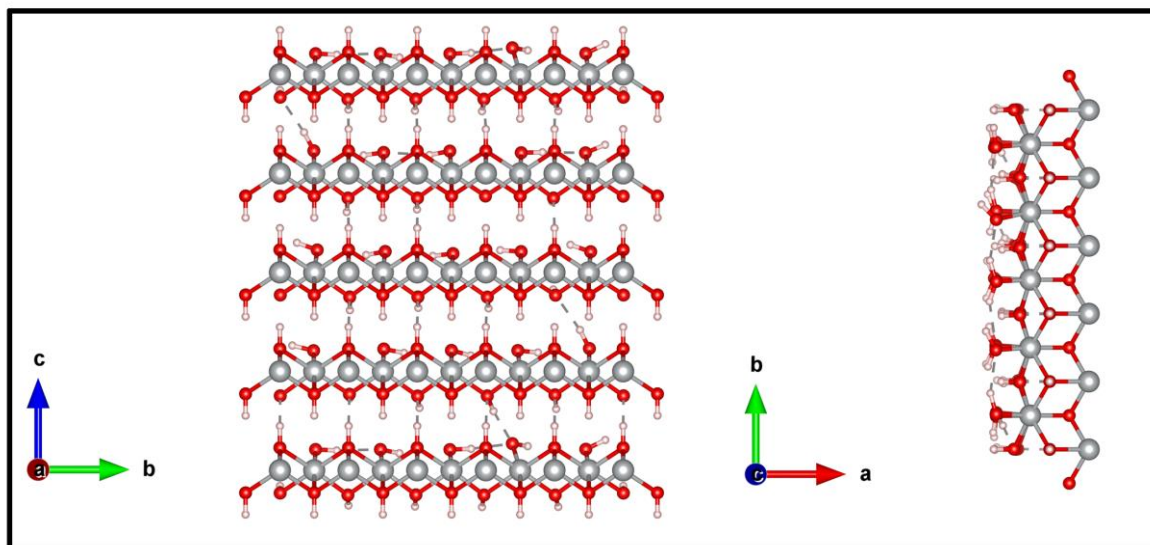

**Fig. S21** Side and top views of an optimized structure for the Ni(OH)<sub>2</sub>

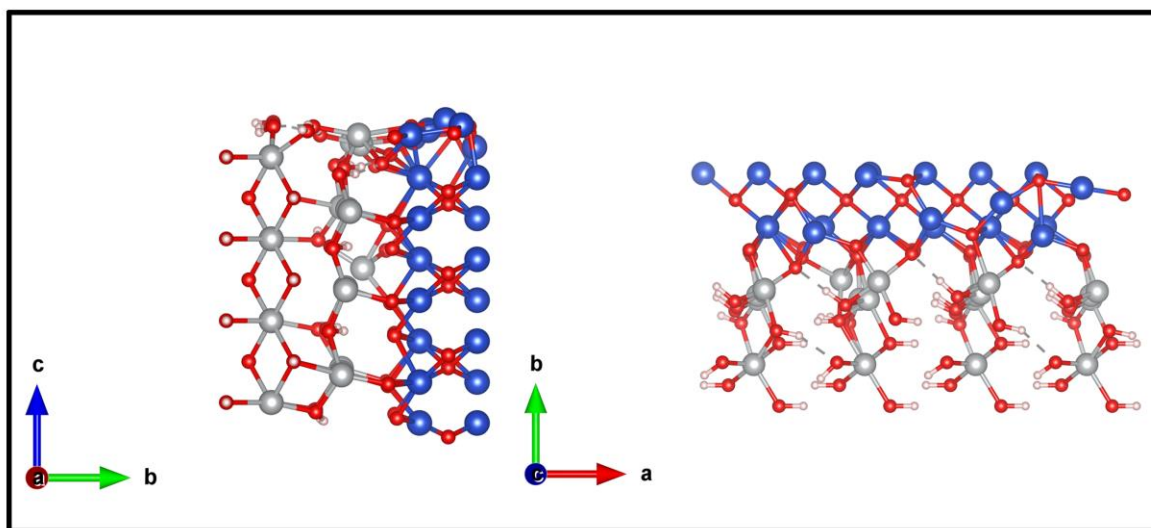

**Fig. S22** Side and top views of an optimized structure for the CuO-Ni(OH)<sub>2</sub> (1:3).

**Table S1** Recently reported electrocatalytic HMF catalysts.

| Catalysts                                                                          | C <sub>HMF</sub><br>(mM) | Potential<br>(V vs. RHE) | Conv.<br>(%) | FDCA Yield<br>(%) | FE.<br>(%)  |
|------------------------------------------------------------------------------------|--------------------------|--------------------------|--------------|-------------------|-------------|
| CuO-PdO <sup>11</sup>                                                              | 50                       | ~                        | 99.5         | 96.2              | 93.7        |
| CF-Cu(OH) <sub>2</sub> <sup>12</sup>                                               | 100                      | 1.81                     | 100          | 98.7              | ~           |
| Ni <sub>0.9</sub> Cu <sub>0.1</sub> (OH) <sub>2</sub> <sup>13</sup>                | 5                        | 1.45                     | ~            | ~                 | 91.2        |
| NiVWv-LMH <sup>14</sup>                                                            | 10                       | 1.434                    | 100          | 97.2              | ~           |
| 14%Ce-Ni(OH) <sub>2</sub> <sup>15</sup>                                            | 10                       | 1.56                     | 99.8         | 97.8              | 86.6        |
| Ni(NS)/CP <sup>16</sup>                                                            | 5                        | 1.36                     | 99.7         | 99.4              | 95.3        |
| NF/Co <sub>4</sub> N@CeO <sub>2</sub> <sup>17</sup>                                | 10                       | 1.425                    | 91.1         | 93.6              | 84.5        |
| Mn-5Ni <sub>2</sub> P <sup>18</sup>                                                | 10                       | 1.43                     | 100          | 98                | 97.8        |
| NiS <sub>x</sub> /Ni <sub>2</sub> P <sup>19</sup>                                  | 10                       | 1.46                     | 100          | 98.5              | 95.1        |
| NiS <sub>x</sub> /βNi(OH) <sub>2</sub> /Ni <sup>20</sup>                           | 10                       | 1.32                     | 99.4         | 97.7              | 98.3        |
| CF-CuO/CeO <sub>2</sub> <sup>21</sup>                                              | 10                       | 1.61                     | 100          | 99.7              | 97.9        |
| NiMo <sub>3</sub> S <sub>4</sub> -R <sup>22</sup>                                  | 10                       | 1.45                     | 99.3         | 98.7              | 98.5        |
| Rh-SA/NiFe<br>NMLDH <sup>23</sup>                                                  | 50                       | 1.3                      | 98           | 99.8              | 98.5        |
| V <sub>O</sub> -Sc <sub>2</sub> O <sub>3</sub> <sup>24</sup>                       | 10                       | 1.46                     | ~            | <95               | <90         |
| δ-MnO <sub>2</sub> <sup>25</sup>                                                   | 10                       | 1.457                    | ~            | 98                | 98          |
| P-Co <sub>3</sub> O <sub>4</sub> -NBA@NF <sup>26</sup>                             | 10                       | 1.636                    | 100          | 96.9              | 97          |
| CoO-CoSe <sub>2</sub> <sup>27</sup>                                                | 10                       | 1.43                     | ~            | 99                | 97.9        |
| Co <sub>9</sub> S <sub>8</sub> -Ni <sub>3</sub> S <sub>2</sub> @NSOC <sup>28</sup> | 10                       | 1.4                      | 99.5         | 98.8              | 98.6        |
| NiCo <sub>2</sub> O <sub>4</sub> -CFP <sup>29</sup>                                | 10                       | 1.43                     | ~            | 94.3              | 89.6        |
| CuCo <sub>2</sub> O <sub>4</sub> <sup>30</sup>                                     | 50                       | 1.45                     | ~            | 93.7              | 94          |
| <b>CuO-Ni(OH)<sub>2</sub><br/>(This work)</b>                                      | <b>10</b>                | <b>1.48</b>              | <b>100</b>   | <b>99.8</b>       | <b>98.4</b> |

**Table S2** Adsorption energy of HMF on different surfaces

| <b>Adsorbed sites</b>   | <b><math>E_{ad/sub}</math></b> | <b><math>E_{ad}</math></b> | <b><math>E_{sub}</math></b> |
|-------------------------|--------------------------------|----------------------------|-----------------------------|
| Ni(OH) <sub>2</sub>     | -8186.665005                   | -8100.911164               | -85.721                     |
| CuO-Ni(OH) <sub>2</sub> | -8023.060820                   | -7937.279332               | -85.721                     |

\*Where  $E_{ad/sub}$ ,  $E_{ad}$ , and  $E_{sub}$  are the total energies of the optimized adsorbate/substrate system, the adsorbate in the gas phase, and the clean substrate, respectively.

**Table S3** Bader charge analysis of CuO-Ni(OH)<sub>2</sub>

| #  | X        | Y        | Z        | CHARGE   | MIN DIST | ATOMIC VOL |
|----|----------|----------|----------|----------|----------|------------|
| 1  | 4.033173 | 2.872355 | 4.489622 | 0.57051  | 0.349311 | 31.34739   |
| 2  | 4.033173 | 2.872355 | 10.64763 | 0.587202 | 0.344224 | 26.07612   |
| 3  | 4.033173 | 7.939588 | 7.568624 | 0.516397 | 0.319646 | 21.66782   |
| 4  | -4.03317 | 4.561433 | 7.568624 | 0.58795  | 0.349527 | 21.26747   |
| 5  | 4.033173 | 2.872355 | 16.80511 | 0.593075 | 0.389886 | 26.26739   |
| 6  | 4.033173 | 7.939588 | 13.72611 | 0.621584 | 0.386649 | 23.96316   |
| 7  | -4.03317 | 4.561433 | 13.72611 | 0.599491 | 0.387057 | 21.15626   |
| 8  | 4.033173 | 7.939588 | 19.88411 | 0.657412 | 0.389506 | 24.59482   |
| 9  | -4.03317 | 4.561433 | 19.88411 | 0.604297 | 0.375454 | 21.24078   |
| 10 | 13.05766 | 2.872355 | 4.489622 | 0.571861 | 0.37192  | 32.29933   |
| 11 | 13.05766 | 2.872355 | 10.64763 | 0.572256 | 0.367379 | 26.28074   |
| 12 | 13.05766 | 7.939588 | 7.568624 | 0.580611 | 0.374581 | 25.39997   |
| 13 | 4.991583 | 4.561433 | 7.568624 | 0.597392 | 0.392819 | 21.51213   |
| 14 | 13.05766 | 2.872355 | 16.80511 | 0.554521 | 0.37391  | 25.24428   |
| 15 | 13.05766 | 7.939588 | 13.72611 | 0.557843 | 0.377897 | 25.66687   |
| 16 | 4.991583 | 4.561433 | 13.72611 | 0.581362 | 0.409246 | 20.69363   |
| 17 | 13.05766 | 7.939588 | 19.88411 | 0.585717 | 0.375415 | 28.26469   |
| 18 | 4.991583 | 4.561433 | 19.88411 | 0.598068 | 0.39829  | 21.20074   |
| 19 | 22.08215 | 2.872355 | 4.489622 | 0.57478  | 0.379995 | 31.4497    |
| 20 | 22.08215 | 2.872355 | 10.64763 | 0.579984 | 0.418666 | 26.20067   |

---

|    |          |          |          |          |          |          |
|----|----------|----------|----------|----------|----------|----------|
| 21 | 22.08215 | 7.939588 | 7.568624 | 0.60238  | 0.39152  | 27.7042  |
| 22 | 14.01607 | 4.561433 | 7.568624 | 0.586874 | 0.375034 | 21.20074 |
| 23 | 22.08215 | 2.872355 | 16.80511 | 0.572916 | 0.390329 | 25.88484 |
| 24 | 22.08215 | 7.939588 | 13.72611 | 0.582074 | 0.407999 | 27.69531 |
| 25 | 14.01607 | 4.561433 | 13.72611 | 0.564622 | 0.378346 | 20.3778  |
| 26 | 22.08215 | 7.939588 | 19.88411 | 0.629633 | 0.430597 | 29.29226 |
| 27 | 14.01607 | 4.561433 | 19.88411 | 0.569112 | 0.375866 | 20.33777 |
| 28 | 4.033173 | 2.872355 | 22.96311 | 0.61937  | 0.355133 | 29.39902 |
| 29 | 13.05766 | 2.872355 | 22.96311 | 0.585214 | 0.367061 | 27.99335 |
| 30 | 22.08215 | 2.872355 | 22.96311 | 0.605405 | 0.423334 | 27.86879 |
| 31 | -2.62724 | 10.20523 | 3.100002 | 0.492226 | 0.142551 | 32.73971 |
| 32 | -2.99869 | 11.71094 | 9.866458 | 0.541305 | 0.213422 | 26.62326 |
| 33 | -2.8376  | 12.0263  | 16.22133 | 0.498343 | 0.213823 | 21.81017 |
| 34 | 6.212608 | 10.1037  | 3.13675  | 0.477969 | 0.152438 | 31.06714 |
| 35 | 5.471601 | 10.0714  | 10.25022 | 0.529463 | 0.193465 | 25.23538 |
| 36 | 5.231457 | 9.749578 | 17.39361 | 0.54313  | 0.249728 | 20.1109  |
| 37 | 15.06924 | 9.948021 | 3.293194 | 0.506058 | 0.220882 | 33.46479 |
| 38 | 14.73515 | 11.21283 | 10.1216  | 0.528253 | 0.225877 | 28.83408 |
| 39 | 14.87674 | 11.80201 | 16.29483 | 0.485854 | 0.198661 | 22.68649 |
| 40 | 3.673905 | 8.58876  | 25.01001 | 0.504157 | 0.265214 | 20.93384 |
| 41 | -3.99933 | 5.365668 | 24.81996 | 0.55153  | 0.269743 | 22.72652 |
| 42 | -3.0041  | 12.57025 | 21.70106 | 0.514969 | 0.263434 | 17.14832 |

---



---

|    |          |          |          |          |          |          |
|----|----------|----------|----------|----------|----------|----------|
| 43 | 13.32217 | 9.718811 | 25.00371 | 0.483874 | 0.257991 | 22.126   |
| 44 | 5.45671  | 5.10323  | 25.51871 | 0.512652 | 0.203408 | 26.07167 |
| 45 | 5.898824 | 12.20228 | 22.31319 | 0.532348 | 0.253244 | 15.93837 |
| 46 | 21.77675 | 9.019798 | 25.36594 | 0.509532 | 0.279812 | 22.73097 |
| 47 | 14.19557 | 5.374282 | 25.17905 | 0.50554  | 0.21618  | 24.2434  |
| 48 | 15.16021 | 13.0179  | 22.23287 | 0.508966 | 0.224387 | 16.47662 |
| 49 | 0        | 6.25051  | 4.489622 | 17.12351 | 1.57645  | 130.514  |
| 50 | 0        | 6.25051  | 10.64763 | 17.00655 | 1.764651 | 85.47468 |
| 51 | 0        | 6.25051  | 16.80511 | 16.96372 | 1.760569 | 87.07607 |
| 52 | 9.024486 | 6.25051  | 4.489622 | 17.1245  | 1.595471 | 131.079  |
| 53 | 9.024486 | 6.25051  | 10.64763 | 16.9093  | 1.758944 | 77.89027 |
| 54 | 9.024486 | 6.25051  | 16.80511 | 16.94094 | 1.759598 | 77.28975 |
| 55 | 18.04924 | 6.25051  | 4.489622 | 17.11161 | 1.554023 | 127.9162 |
| 56 | 18.04924 | 6.25051  | 10.64763 | 16.95639 | 1.759708 | 82.66778 |
| 57 | 18.04924 | 6.25051  | 16.80511 | 16.97324 | 1.758635 | 85.51471 |
| 58 | 0        | 6.25051  | 22.96311 | 16.86118 | 1.536375 | 81.40445 |
| 59 | 9.024486 | 6.25051  | 22.96311 | 16.94694 | 1.574149 | 89.54045 |
| 60 | 18.04924 | 6.25051  | 22.96311 | 16.95358 | 1.499744 | 89.03334 |
| 61 | 0.336256 | 11.5448  | 6.565389 | 17.09104 | 1.587505 | 111.6976 |
| 62 | 0.340046 | 11.86416 | 12.95439 | 17.11013 | 1.601162 | 99.97623 |
| 63 | 0.843076 | 12.17582 | 18.86618 | 17.0931  | 1.627539 | 83.66865 |
| 64 | 8.633    | 11.53957 | 7.05572  | 17.08592 | 1.592416 | 113.3257 |

---

---

|    |          |          |          |          |          |          |
|----|----------|----------|----------|----------|----------|----------|
| 65 | 7.110915 | 13.13296 | 14.59862 | 17.08893 | 1.534465 | 96.71116 |
| 66 | 9.310655 | 11.53403 | 19.19219 | 17.12662 | 1.62809  | 98.93532 |
| 67 | 17.9423  | 11.54695 | 6.728133 | 17.0729  | 1.590466 | 113.9262 |
| 68 | 18.1061  | 11.85523 | 13.11555 | 17.06671 | 1.616252 | 104.5091 |
| 69 | 18.44912 | 12.01337 | 19.03207 | 17.05773 | 1.609391 | 93.91761 |
| 70 | 0.847949 | 12.34288 | 24.11649 | 17.02099 | 1.525537 | 99.58478 |
| 71 | 10.1494  | 12.98282 | 23.94797 | 16.99143 | 1.491511 | 92.41852 |
| 72 | 19.11974 | 12.82192 | 24.60735 | 17.05509 | 1.57617  | 111.017  |
| 73 | 2.058957 | 2.872355 | 4.489622 | 6.77525  | 1.32668  | 130.0158 |
| 74 | 3.024406 | 19.58284 | 7.089843 | 7.074428 | 1.523021 | 60.00353 |
| 75 | 7.536785 | 19.58284 | 1.889925 | 6.912324 | 1.553162 | 116.1059 |
| 76 | 2.058957 | 2.872355 | 10.64763 | 6.73698  | 1.325414 | 117.8763 |
| 77 | 2.058957 | 7.939588 | 7.568624 | 6.993673 | 1.496395 | 92.72545 |
| 78 | -2.05896 | 4.561433 | 7.568624 | 6.846574 | 1.327547 | 104.9317 |
| 79 | 3.024406 | 19.58284 | 13.24732 | 7.104101 | 1.534949 | 60.60851 |
| 80 | 7.536785 | 19.58284 | 8.047405 | 7.105623 | 1.549813 | 60.50175 |
| 81 | 2.058957 | 2.872355 | 16.80511 | 6.729682 | 1.327239 | 119.7758 |
| 82 | 2.058957 | 7.939588 | 13.72611 | 6.940209 | 1.328368 | 89.45148 |
| 83 | -2.05896 | 4.561433 | 13.72611 | 6.895755 | 1.328487 | 106.9735 |
| 84 | 3.024406 | 19.58284 | 19.40533 | 7.151795 | 1.536899 | 62.0898  |
| 85 | 7.536785 | 19.58284 | 14.20541 | 7.10807  | 1.507132 | 61.60048 |
| 86 | 2.058957 | 7.939588 | 19.88411 | 6.928085 | 1.327664 | 86.69797 |

---

---

|     |          |          |          |          |          |          |
|-----|----------|----------|----------|----------|----------|----------|
| 87  | -2.05896 | 4.561433 | 19.88411 | 6.883478 | 1.327783 | 104.6781 |
| 88  | 7.536785 | 19.58284 | 20.36289 | 7.075032 | 1.510439 | 59.0338  |
| 89  | 11.08344 | 2.872355 | 4.489622 | 6.793932 | 1.439477 | 130.4517 |
| 90  | 12.04889 | 19.58284 | 7.089843 | 7.073275 | 1.540438 | 60.3594  |
| 91  | 16.56127 | 19.58284 | 1.889925 | 6.938284 | 1.542628 | 117.8185 |
| 92  | 11.08344 | 2.872355 | 10.64763 | 6.786664 | 1.43831  | 119.5266 |
| 93  | 11.08344 | 7.939588 | 7.568624 | 6.939983 | 1.440167 | 98.28587 |
| 94  | 6.9658   | 4.561433 | 7.568624 | 6.870674 | 1.384028 | 103.8285 |
| 95  | 12.04889 | 19.58284 | 13.24732 | 7.120055 | 1.559056 | 61.25351 |
| 96  | 16.56127 | 19.58284 | 8.047405 | 7.088677 | 1.516928 | 60.73751 |
| 97  | 11.08344 | 2.872355 | 16.80511 | 6.779808 | 1.439992 | 121.4795 |
| 98  | 11.08344 | 7.939588 | 13.72611 | 6.925597 | 1.441033 | 110.9191 |
| 99  | 6.9658   | 4.561433 | 13.72611 | 6.862741 | 1.384929 | 104.1532 |
| 100 | 12.04889 | 19.58284 | 19.40533 | 7.136793 | 1.533511 | 61.32024 |
| 101 | 16.56127 | 19.58284 | 14.20541 | 7.098215 | 1.53969  | 60.99996 |
| 102 | 11.08344 | 7.939588 | 19.88411 | 6.94204  | 1.440384 | 88.77978 |
| 103 | 6.9658   | 4.561433 | 19.88411 | 6.870917 | 1.384254 | 103.3792 |
| 104 | 16.56127 | 19.58284 | 20.36289 | 7.079367 | 1.523125 | 67.93491 |
| 105 | 20.1082  | 2.872355 | 4.489622 | 6.811821 | 1.382956 | 131.3192 |
| 106 | 21.07365 | 19.58284 | 7.089843 | 7.082286 | 1.526692 | 60.37274 |
| 107 | 25.58576 | 19.58284 | 1.889925 | 6.935323 | 1.549991 | 115.4342 |
| 108 | 20.1082  | 2.872355 | 10.64763 | 6.769558 | 1.381742 | 119.758  |

---

---

|     |          |          |          |          |          |          |
|-----|----------|----------|----------|----------|----------|----------|
| 109 | 20.1082  | 7.939588 | 7.568624 | 6.956092 | 1.383674 | 98.5928  |
| 110 | 15.99029 | 4.561433 | 7.568624 | 6.880084 | 1.440244 | 104.7226 |
| 111 | 21.07365 | 19.58284 | 13.24732 | 7.123375 | 1.522361 | 61.20013 |
| 112 | 25.58576 | 19.58284 | 8.047405 | 7.076669 | 1.553432 | 60.47506 |
| 113 | 20.1082  | 2.872355 | 16.80511 | 6.705484 | 1.383493 | 119.6512 |
| 114 | 20.1082  | 7.939588 | 13.72611 | 6.96795  | 1.384575 | 98.48159 |
| 115 | 15.99029 | 4.561433 | 13.72611 | 6.924925 | 1.44111  | 106.5375 |
| 116 | 21.07365 | 19.58284 | 19.40533 | 7.098643 | 1.519847 | 62.37449 |
| 117 | 25.58576 | 19.58284 | 14.20541 | 7.09746  | 1.52091  | 60.4884  |
| 118 | 20.1082  | 7.939588 | 19.88411 | 6.933857 | 1.3839   | 94.70051 |
| 119 | 15.99029 | 4.561433 | 19.88411 | 6.892118 | 1.440461 | 105.6701 |
| 120 | 25.58576 | 19.58284 | 20.36289 | 7.095814 | 1.543493 | 63.8113  |

---

**Table S4** Unit-cell and position parameters of Ni(OH)<sub>2</sub> optimization model.

| <b>Ni(OH)<sub>2</sub></b>   |                |          |          |
|-----------------------------|----------------|----------|----------|
|                             | <b>a (Å)</b>   |          |          |
|                             | 19.46900       |          |          |
|                             | <b>b (Å)</b>   |          |          |
|                             | 15.48110       |          |          |
|                             | <b>c (Å)</b>   |          |          |
|                             | 17.80660       |          |          |
|                             | <b>α (deg)</b> | 90.0     |          |
|                             | <b>β (deg)</b> | 90.0     |          |
|                             | <b>γ (deg)</b> | 90.0     |          |
| <b>Atom<br/>Coordinates</b> | <b>x</b>       | <b>y</b> | <b>z</b> |
| H2                          | 0.95409        | 0.10000  | -0.11173 |
| H3                          | 0.90818        | 0.00000  | 0.11173  |
| H4                          | 0.95409        | 0.30000  | -0.11173 |
| H5                          | 0.90818        | 0.20000  | 0.11173  |
| H6                          | 0.95409        | 0.50000  | -0.11173 |
| H7                          | 0.90818        | 0.40000  | 0.11173  |
| H8                          | 0.95409        | 0.70000  | -0.11173 |
| H9                          | 0.90818        | 0.60000  | 0.11173  |
| H10                         | 0.95409        | 0.90000  | -0.11173 |
| H11                         | 0.90818        | 0.80000  | 0.11173  |
| H12                         | 0.95409        | 0.10000  | 0.13827  |
| H13                         | 0.90818        | 0.00000  | 0.36173  |

---

|     |         |         |         |
|-----|---------|---------|---------|
| H14 | 0.95409 | 0.30000 | 0.13827 |
| H15 | 0.90818 | 0.20000 | 0.36173 |
| H16 | 0.95409 | 0.50000 | 0.13827 |
| H17 | 0.90818 | 0.40000 | 0.36173 |
| H18 | 0.95409 | 0.70000 | 0.13827 |
| H19 | 0.90818 | 0.60000 | 0.36173 |
| H20 | 0.95409 | 0.90000 | 0.13827 |
| H21 | 0.90818 | 0.80000 | 0.36173 |
| H22 | 0.95409 | 0.10000 | 0.38827 |
| H23 | 0.90818 | 0.00000 | 0.61173 |
| H24 | 0.95409 | 0.30000 | 0.38827 |
| H25 | 0.90818 | 0.20000 | 0.61173 |
| H26 | 0.95409 | 0.50000 | 0.38827 |
| H27 | 0.90818 | 0.40000 | 0.61173 |
| H28 | 0.95409 | 0.70000 | 0.38827 |
| H29 | 0.90818 | 0.60000 | 0.61173 |
| H30 | 0.95409 | 0.90000 | 0.38827 |
| H31 | 0.90818 | 0.80000 | 0.61173 |
| H32 | 0.95409 | 0.10000 | 0.63827 |
| H33 | 0.90818 | 0.00000 | 0.86173 |
| H34 | 0.95409 | 0.30000 | 0.63827 |
| H35 | 0.90818 | 0.20000 | 0.86173 |

---

---

|     |         |         |          |
|-----|---------|---------|----------|
| H36 | 0.95409 | 0.50000 | 0.63827  |
| H37 | 0.90818 | 0.40000 | 0.86173  |
| H38 | 0.95409 | 0.70000 | 0.63827  |
| H39 | 0.90818 | 0.60000 | 0.86173  |
| H40 | 0.95409 | 0.90000 | 0.63827  |
| H41 | 0.90818 | 0.80000 | 0.86173  |
| H42 | 0.76888 | 0.16548 | 0.04996  |
| H43 | 0.77640 | 0.00030 | -0.03954 |
| H44 | 0.75838 | 0.34799 | 0.04300  |
| H45 | 0.79416 | 0.19961 | -0.08886 |
| H46 | 0.76788 | 0.55690 | 0.05427  |
| H47 | 0.79556 | 0.39354 | -0.09149 |
| H48 | 0.74780 | 0.72181 | 0.06087  |
| H49 | 0.79624 | 0.58878 | -0.09293 |
| H50 | 0.77661 | 0.94788 | 0.07648  |
| H51 | 0.79668 | 0.81107 | -0.09243 |
| H52 | 0.77749 | 0.03611 | 0.31527  |
| H53 | 0.78330 | 0.00613 | 0.18574  |
| H54 | 0.76607 | 0.36154 | 0.29651  |
| H55 | 0.78439 | 0.20372 | 0.18177  |
| H56 | 0.76125 | 0.55576 | 0.28991  |
| H57 | 0.79608 | 0.40655 | 0.15768  |

---

---

|     |         |          |         |
|-----|---------|----------|---------|
| H58 | 0.76286 | 0.75159  | 0.29748 |
| H59 | 0.80273 | 0.62209  | 0.14934 |
| H60 | 0.79527 | 0.87417  | 0.35463 |
| H61 | 0.79902 | 0.80477  | 0.15494 |
| H62 | 0.77537 | 0.04965  | 0.57486 |
| H63 | 0.77921 | 0.00067  | 0.44626 |
| H64 | 0.75880 | 0.25133  | 0.54378 |
| H65 | 0.79781 | 0.20380  | 0.40440 |
| H66 | 0.75953 | 0.44576  | 0.54143 |
| H67 | 0.79495 | 0.40316  | 0.41038 |
| H68 | 0.76792 | 0.64172  | 0.55600 |
| H69 | 0.79542 | 0.60786  | 0.40910 |
| H70 | 0.77325 | 0.84640  | 0.56963 |
| H71 | 0.77706 | 0.79645  | 0.45678 |
| H72 | 0.79815 | 0.07034  | 0.85383 |
| H73 | 0.77931 | -0.00127 | 0.69868 |
| H74 | 0.76297 | 0.24404  | 0.79577 |
| H75 | 0.79950 | 0.19466  | 0.65227 |
| H76 | 0.76657 | 0.43609  | 0.79665 |
| H77 | 0.79525 | 0.39935  | 0.65908 |
| H78 | 0.77050 | 0.76508  | 0.80347 |
| H79 | 0.77911 | 0.59883  | 0.69963 |

---



---

|       |         |         |         |
|-------|---------|---------|---------|
| H80   | 0.76782 | 0.94719 | 0.82218 |
| H81   | 0.78493 | 0.79332 | 0.67851 |
| Ni82  | 0.86227 | 0.10000 | 0.00000 |
| Ni83  | 1.00000 | 0.00000 | 0.00000 |
| Ni84  | 0.86227 | 0.30000 | 0.00000 |
| Ni85  | 1.00000 | 0.20000 | 0.00000 |
| Ni86  | 0.86227 | 0.50000 | 0.00000 |
| Ni87  | 1.00000 | 0.40000 | 0.00000 |
| Ni88  | 0.86227 | 0.70000 | 0.00000 |
| Ni89  | 1.00000 | 0.60000 | 0.00000 |
| Ni90  | 0.86227 | 0.90000 | 0.00000 |
| Ni91  | 1.00000 | 0.80000 | 0.00000 |
| Ni92  | 0.86227 | 0.10000 | 0.25000 |
| Ni93  | 1.00000 | 0.00000 | 0.25000 |
| Ni94  | 0.86227 | 0.30000 | 0.25000 |
| Ni95  | 1.00000 | 0.20000 | 0.25000 |
| Ni96  | 0.86227 | 0.50000 | 0.25000 |
| Ni97  | 1.00000 | 0.40000 | 0.25000 |
| Ni98  | 0.86227 | 0.70000 | 0.25000 |
| Ni99  | 1.00000 | 0.60000 | 0.25000 |
| Ni100 | 0.86227 | 0.90000 | 0.25000 |
| Ni101 | 1.00000 | 0.80000 | 0.25000 |

---

---

|       |         |         |          |
|-------|---------|---------|----------|
| Ni102 | 0.86227 | 0.10000 | 0.50000  |
| Ni103 | 1.00000 | 0.00000 | 0.50000  |
| Ni104 | 0.86227 | 0.30000 | 0.50000  |
| Ni105 | 1.00000 | 0.20000 | 0.50000  |
| Ni106 | 0.86227 | 0.50000 | 0.50000  |
| Ni107 | 1.00000 | 0.40000 | 0.50000  |
| Ni108 | 0.86227 | 0.70000 | 0.50000  |
| Ni109 | 1.00000 | 0.60000 | 0.50000  |
| Ni110 | 0.86227 | 0.90000 | 0.50000  |
| Ni111 | 1.00000 | 0.80000 | 0.50000  |
| Ni112 | 0.86227 | 0.10000 | 0.75000  |
| Ni113 | 1.00000 | 0.00000 | 0.75000  |
| Ni114 | 0.86227 | 0.30000 | 0.75000  |
| Ni115 | 1.00000 | 0.20000 | 0.75000  |
| Ni116 | 0.86227 | 0.50000 | 0.75000  |
| Ni117 | 1.00000 | 0.40000 | 0.75000  |
| Ni118 | 0.86227 | 0.70000 | 0.75000  |
| Ni119 | 1.00000 | 0.60000 | 0.75000  |
| Ni120 | 0.86227 | 0.90000 | 0.75000  |
| Ni121 | 1.00000 | 0.80000 | 0.75000  |
| O122  | 0.95409 | 0.10000 | -0.05704 |
| O123  | 0.90818 | 0.00000 | 0.05704  |

---

---

|      |         |         |          |
|------|---------|---------|----------|
| O124 | 0.95409 | 0.30000 | -0.05704 |
| O125 | 0.90818 | 0.20000 | 0.05704  |
| O126 | 0.95409 | 0.50000 | -0.05704 |
| O127 | 0.90818 | 0.40000 | 0.05704  |
| O128 | 0.95409 | 0.70000 | -0.05704 |
| O129 | 0.90818 | 0.60000 | 0.05704  |
| O130 | 0.95409 | 0.90000 | -0.05704 |
| O131 | 0.90818 | 0.80000 | 0.05704  |
| O132 | 0.95409 | 0.10000 | 0.19296  |
| O133 | 0.90818 | 0.00000 | 0.30704  |
| O134 | 0.95409 | 0.30000 | 0.19296  |
| O135 | 0.90818 | 0.20000 | 0.30704  |
| O136 | 0.95409 | 0.50000 | 0.19296  |
| O137 | 0.90818 | 0.40000 | 0.30704  |
| O138 | 0.95409 | 0.70000 | 0.19296  |
| O139 | 0.90818 | 0.60000 | 0.30704  |
| O140 | 0.95409 | 0.90000 | 0.19296  |
| O141 | 0.90818 | 0.80000 | 0.30704  |
| O142 | 0.95409 | 0.10000 | 0.44296  |
| O143 | 0.90818 | 0.00000 | 0.55704  |
| O144 | 0.95409 | 0.30000 | 0.44296  |
| O145 | 0.90818 | 0.20000 | 0.55704  |

---

---

|      |         |         |          |
|------|---------|---------|----------|
| O146 | 0.95409 | 0.50000 | 0.44296  |
| O147 | 0.90818 | 0.40000 | 0.55704  |
| O148 | 0.95409 | 0.70000 | 0.44296  |
| O149 | 0.90818 | 0.60000 | 0.55704  |
| O150 | 0.95409 | 0.90000 | 0.44296  |
| O151 | 0.90818 | 0.80000 | 0.55704  |
| O152 | 0.95409 | 0.10000 | 0.69296  |
| O153 | 0.90818 | 0.00000 | 0.80704  |
| O154 | 0.95409 | 0.30000 | 0.69296  |
| O155 | 0.90818 | 0.20000 | 0.80704  |
| O156 | 0.95409 | 0.50000 | 0.69296  |
| O157 | 0.90818 | 0.40000 | 0.80704  |
| O158 | 0.95409 | 0.70000 | 0.69296  |
| O159 | 0.90818 | 0.60000 | 0.80704  |
| O160 | 0.95409 | 0.90000 | 0.69296  |
| O161 | 0.90818 | 0.80000 | 0.80704  |
| O162 | 0.78189 | 0.10397 | 0.05256  |
| O163 | 0.82399 | 0.00074 | -0.05763 |
| O164 | 0.78154 | 0.29286 | 0.05258  |
| O165 | 0.83813 | 0.19811 | -0.06257 |
| O166 | 0.78228 | 0.49527 | 0.05226  |
| O167 | 0.83792 | 0.39612 | -0.06208 |

---

---

|      |         |         |          |
|------|---------|---------|----------|
| O168 | 0.78247 | 0.67725 | 0.06733  |
| O169 | 0.83794 | 0.59446 | -0.06254 |
| O170 | 0.78158 | 0.89112 | 0.05311  |
| O171 | 0.83821 | 0.80206 | -0.06263 |
| O172 | 0.78247 | 0.09807 | 0.30223  |
| O173 | 0.83321 | 0.00103 | 0.18819  |
| O174 | 0.78314 | 0.30272 | 0.30639  |
| O175 | 0.83359 | 0.20253 | 0.19216  |
| O176 | 0.78170 | 0.49975 | 0.30291  |
| O177 | 0.83807 | 0.40122 | 0.18758  |
| O178 | 0.78217 | 0.69321 | 0.30253  |
| O179 | 0.83785 | 0.60422 | 0.18786  |
| O180 | 0.78070 | 0.90163 | 0.30760  |
| O181 | 0.83739 | 0.80134 | 0.19051  |
| O182 | 0.78270 | 0.10865 | 0.55659  |
| O183 | 0.82928 | 0.00115 | 0.44285  |
| O184 | 0.78151 | 0.30676 | 0.55279  |
| O185 | 0.83780 | 0.20334 | 0.43790  |
| O186 | 0.77810 | 0.50432 | 0.54746  |
| O187 | 0.83845 | 0.40201 | 0.43784  |
| O188 | 0.78188 | 0.70269 | 0.55251  |
| O189 | 0.83829 | 0.60439 | 0.43754  |

---

---

|      |         |         |         |
|------|---------|---------|---------|
| O190 | 0.78171 | 0.90536 | 0.55218 |
| O191 | 0.82537 | 0.80289 | 0.44241 |
| O192 | 0.78310 | 0.09891 | 0.80711 |
| O193 | 0.82913 | 0.00014 | 0.69241 |
| O194 | 0.78159 | 0.30230 | 0.80291 |
| O195 | 0.83789 | 0.19848 | 0.68773 |
| O196 | 0.78327 | 0.49501 | 0.80640 |
| O197 | 0.83808 | 0.40078 | 0.68771 |
| O198 | 0.78242 | 0.70306 | 0.80221 |
| O199 | 0.82906 | 0.59896 | 0.69286 |
| O200 | 0.77816 | 0.89021 | 0.80196 |
| O201 | 0.83413 | 0.79709 | 0.68794 |

---

**Table S5** Unit-cell and position parameters of CuO-Ni(OH)<sub>2</sub> (1:3) optimization model

| <b>CuO-Ni(OH)<sub>2</sub> (1:3)</b> |          |          |          |
|-------------------------------------|----------|----------|----------|
| a (Å)                               | 14.32680 |          |          |
| b (Å)                               | 16.28090 |          |          |
| c (Å)                               | 27.78070 |          |          |
| α (deg)                             | 90.0     |          |          |
| β (deg)                             | 90.0     |          |          |
| γ (deg)                             | 90.0     |          |          |
| <b>Atom<br/>Coordinates</b>         | <b>x</b> | <b>y</b> | <b>z</b> |
| H2                                  | 0.14897  | 0.09336  | 0.08552  |
| H3                                  | 0.14897  | 0.09336  | 0.20282  |
| H4                                  | 0.14897  | 0.25806  | 0.14417  |
| H5                                  | -0.14897 | 0.14826  | 0.14417  |
| H6                                  | 0.14897  | 0.09336  | 0.32011  |
| H7                                  | 0.14897  | 0.25806  | 0.26146  |
| H8                                  | -0.14897 | 0.14826  | 0.26146  |
| H9                                  | 0.14897  | 0.25806  | 0.37876  |
| H10                                 | -0.14897 | 0.14826  | 0.37876  |
| H11                                 | 0.48230  | 0.09336  | 0.08552  |
| H12                                 | 0.48230  | 0.09336  | 0.20282  |
| H13                                 | 0.48230  | 0.25806  | 0.14417  |

---

|     |          |         |         |
|-----|----------|---------|---------|
| H14 | 0.18437  | 0.14826 | 0.14417 |
| H15 | 0.48230  | 0.09336 | 0.32011 |
| H16 | 0.48230  | 0.25806 | 0.26146 |
| H17 | 0.18437  | 0.14826 | 0.26146 |
| H18 | 0.48230  | 0.25806 | 0.37876 |
| H19 | 0.18437  | 0.14826 | 0.37876 |
| H20 | 0.81563  | 0.09336 | 0.08552 |
| H21 | 0.81563  | 0.09336 | 0.20282 |
| H22 | 0.81563  | 0.25806 | 0.14417 |
| H23 | 0.51770  | 0.14826 | 0.14417 |
| H24 | 0.81563  | 0.09336 | 0.32011 |
| H25 | 0.81563  | 0.25806 | 0.26146 |
| H26 | 0.51770  | 0.14826 | 0.26146 |
| H27 | 0.81563  | 0.25806 | 0.37876 |
| H28 | 0.51770  | 0.14826 | 0.37876 |
| H29 | 0.14897  | 0.09336 | 0.43741 |
| H30 | 0.48230  | 0.09336 | 0.43741 |
| H31 | 0.81563  | 0.09336 | 0.43741 |
| H32 | -0.09704 | 0.33170 | 0.05905 |
| H33 | -0.11076 | 0.38064 | 0.18794 |
| H34 | -0.10481 | 0.39089 | 0.30899 |
| H35 | 0.22947  | 0.32840 | 0.05975 |

---



---

|      |          |         |         |
|------|----------|---------|---------|
| H36  | 0.20210  | 0.32735 | 0.19525 |
| H37  | 0.19323  | 0.31689 | 0.33132 |
| H38  | 0.55660  | 0.32334 | 0.06273 |
| H39  | 0.54426  | 0.36445 | 0.19280 |
| H40  | 0.54949  | 0.38360 | 0.31039 |
| H41  | 0.13570  | 0.27916 | 0.47640 |
| H42  | -0.14772 | 0.17440 | 0.47278 |
| H43  | -0.11096 | 0.40857 | 0.41337 |
| H44  | 0.49207  | 0.31589 | 0.47628 |
| H45  | 0.20155  | 0.16587 | 0.48609 |
| H46  | 0.21788  | 0.39661 | 0.42503 |
| H47  | 0.80435  | 0.29317 | 0.48318 |
| H48  | 0.52433  | 0.17468 | 0.47962 |
| H49  | 0.55996  | 0.42312 | 0.42350 |
| Ni50 | 0.00000  | 0.20316 | 0.08552 |
| Ni51 | 0.00000  | 0.20316 | 0.20282 |
| Ni52 | 0.00000  | 0.20316 | 0.32011 |
| Ni53 | 0.33333  | 0.20316 | 0.08552 |
| Ni54 | 0.33333  | 0.20316 | 0.20282 |
| Ni55 | 0.33333  | 0.20316 | 0.32011 |
| Ni56 | 0.66667  | 0.20316 | 0.08552 |
| Ni57 | 0.66667  | 0.20316 | 0.20282 |

---

---

|      |          |         |         |
|------|----------|---------|---------|
| Ni58 | 0.66667  | 0.20316 | 0.32011 |
| Ni59 | 0.00000  | 0.20316 | 0.43741 |
| Ni60 | 0.33333  | 0.20316 | 0.43741 |
| Ni61 | 0.66667  | 0.20316 | 0.43741 |
| Ni62 | 0.01242  | 0.37524 | 0.12506 |
| Ni63 | 0.01256  | 0.38562 | 0.24676 |
| Ni64 | 0.03114  | 0.39575 | 0.35937 |
| Ni65 | 0.31887  | 0.37507 | 0.13440 |
| Ni66 | 0.26265  | 0.42686 | 0.27808 |
| Ni67 | 0.34390  | 0.37489 | 0.36558 |
| Ni68 | 0.66272  | 0.37531 | 0.12816 |
| Ni69 | 0.66877  | 0.38533 | 0.24983 |
| Ni70 | 0.68144  | 0.39047 | 0.36253 |
| Ni71 | 0.03132  | 0.40118 | 0.45938 |
| Ni72 | 0.37488  | 0.42198 | 0.45617 |
| Ni73 | 0.70621  | 0.41675 | 0.46873 |
| O74  | 0.07605  | 0.09336 | 0.08552 |
| O75  | 0.11171  | 0.63650 | 0.13505 |
| O76  | 0.27838  | 0.63650 | 0.03600 |
| O77  | 0.07605  | 0.09336 | 0.20282 |
| O78  | 0.07605  | 0.25806 | 0.14417 |
| O79  | -0.07605 | 0.14826 | 0.14417 |

---

---

|      |          |         |         |
|------|----------|---------|---------|
| O80  | 0.11171  | 0.63650 | 0.25234 |
| O81  | 0.27838  | 0.63650 | 0.15329 |
| O82  | 0.07605  | 0.09336 | 0.32011 |
| O83  | 0.07605  | 0.25806 | 0.26146 |
| O84  | -0.07605 | 0.14826 | 0.26146 |
| O85  | 0.11171  | 0.63650 | 0.36964 |
| O86  | 0.27838  | 0.63650 | 0.27059 |
| O87  | 0.07605  | 0.25806 | 0.37876 |
| O88  | -0.07605 | 0.14826 | 0.37876 |
| O89  | 0.27838  | 0.63650 | 0.38788 |
| O90  | 0.40938  | 0.09336 | 0.08552 |
| O91  | 0.44504  | 0.63650 | 0.13505 |
| O92  | 0.61171  | 0.63650 | 0.03600 |
| O93  | 0.40938  | 0.09336 | 0.20282 |
| O94  | 0.40938  | 0.25806 | 0.14417 |
| O95  | 0.25729  | 0.14826 | 0.14417 |
| O96  | 0.44504  | 0.63650 | 0.25234 |
| O97  | 0.61171  | 0.63650 | 0.15329 |
| O98  | 0.40938  | 0.09336 | 0.32011 |
| O99  | 0.40938  | 0.25806 | 0.26146 |
| O100 | 0.25729  | 0.14826 | 0.26146 |
| O101 | 0.44504  | 0.63650 | 0.36964 |

---

---

|      |         |         |         |
|------|---------|---------|---------|
| O102 | 0.61171 | 0.63650 | 0.27059 |
| O103 | 0.40938 | 0.25806 | 0.37876 |
| O104 | 0.25729 | 0.14826 | 0.37876 |
| O105 | 0.61171 | 0.63650 | 0.38788 |
| O106 | 0.74272 | 0.09336 | 0.08552 |
| O107 | 0.77838 | 0.63650 | 0.13505 |
| O108 | 0.94504 | 0.63650 | 0.03600 |
| O109 | 0.74272 | 0.09336 | 0.20282 |
| O110 | 0.74272 | 0.25806 | 0.14417 |
| O111 | 0.59062 | 0.14826 | 0.14417 |
| O112 | 0.77838 | 0.63650 | 0.25234 |
| O113 | 0.94504 | 0.63650 | 0.15329 |
| O114 | 0.74272 | 0.09336 | 0.32011 |
| O115 | 0.74272 | 0.25806 | 0.26146 |
| O116 | 0.59062 | 0.14826 | 0.26146 |
| O117 | 0.77838 | 0.63650 | 0.36964 |
| O118 | 0.94504 | 0.63650 | 0.27059 |
| O119 | 0.74272 | 0.25806 | 0.37876 |
| O120 | 0.59062 | 0.14826 | 0.37876 |
| O121 | 0.94504 | 0.63650 | 0.38788 |
| O122 | 0.07605 | 0.09336 | 0.43741 |
| O123 | 0.40938 | 0.09336 | 0.43741 |

---

---

|      |          |         |         |
|------|----------|---------|---------|
| O124 | 0.74272  | 0.09336 | 0.43741 |
| O125 | -0.03767 | 0.31213 | 0.07175 |
| O126 | 0.15001  | 0.51047 | 0.06289 |
| O127 | 0.31287  | 0.48417 | 0.11569 |
| O128 | -0.05554 | 0.34445 | 0.18747 |
| O129 | 0.14971  | 0.50489 | 0.18417 |
| O130 | 0.30705  | 0.49494 | 0.22832 |
| O131 | -0.05003 | 0.35388 | 0.30611 |
| O132 | 0.14418  | 0.48421 | 0.30353 |
| O133 | 0.31216  | 0.48813 | 0.34011 |
| O134 | 0.28760  | 0.31222 | 0.07545 |
| O135 | 0.47547  | 0.50531 | 0.06885 |
| O136 | 0.64950  | 0.48881 | 0.10944 |
| O137 | 0.26884  | 0.31761 | 0.19044 |
| O138 | 0.48232  | 0.50501 | 0.18480 |
| O139 | 0.65028  | 0.49522 | 0.22830 |
| O140 | 0.25687  | 0.31816 | 0.31855 |
| O141 | 0.48126  | 0.50001 | 0.30614 |
| O142 | 0.65076  | 0.50119 | 0.34655 |
| O143 | 0.61831  | 0.30870 | 0.07478 |
| O144 | 0.81751  | 0.51116 | 0.06282 |
| O145 | 0.99279  | 0.48928 | 0.11203 |

---

---

|      |          |         |         |
|------|----------|---------|---------|
| O146 | 0.60632  | 0.33840 | 0.19070 |
| O147 | 0.81901  | 0.50465 | 0.18151 |
| O148 | 0.98750  | 0.49854 | 0.23085 |
| O149 | 0.60626  | 0.34861 | 0.30899 |
| O150 | 0.81287  | 0.49914 | 0.30618 |
| O151 | 0.98668  | 0.50509 | 0.34401 |
| O152 | 0.06794  | 0.29177 | 0.47483 |
| O153 | -0.09382 | 0.20859 | 0.48118 |
| O154 | -0.05685 | 0.36954 | 0.41228 |
| O155 | 0.12539  | 0.45802 | 0.42475 |
| O156 | 0.11224  | 0.65111 | 0.47157 |
| O157 | 0.30610  | 0.51520 | 0.46254 |
| O158 | 0.42530  | 0.32281 | 0.46888 |
| O159 | 0.24989  | 0.20818 | 0.48729 |
| O160 | 0.27505  | 0.35982 | 0.42533 |
| O161 | 0.47451  | 0.49451 | 0.44079 |
| O162 | 0.46191  | 0.68800 | 0.47206 |
| O163 | 0.65629  | 0.54615 | 0.48114 |
| O164 | 0.73730  | 0.30638 | 0.48096 |
| O165 | 0.57994  | 0.20839 | 0.48455 |
| O166 | 0.61165  | 0.38127 | 0.42191 |
| O167 | 0.79337  | 0.47419 | 0.42797 |

---

---

|       |         |         |         |
|-------|---------|---------|---------|
| O168  | 0.85635 | 0.68794 | 0.48125 |
| O169  | 0.98759 | 0.50551 | 0.46578 |
| Cu170 | 0.04164 | 0.56595 | 0.05622 |
| Cu171 | 0.01521 | 0.70702 | 0.11487 |
| Cu172 | 0.18188 | 0.70702 | 0.05618 |
| Cu173 | 0.20831 | 0.56595 | 0.11482 |
| Cu174 | 0.04164 | 0.56595 | 0.17351 |
| Cu175 | 0.01521 | 0.70702 | 0.23216 |
| Cu176 | 0.18188 | 0.70702 | 0.17347 |
| Cu177 | 0.20831 | 0.56595 | 0.23212 |
| Cu178 | 0.04164 | 0.56595 | 0.29081 |
| Cu179 | 0.01521 | 0.70702 | 0.34946 |
| Cu180 | 0.18188 | 0.70702 | 0.29077 |
| Cu181 | 0.20831 | 0.56595 | 0.34941 |
| Cu182 | 0.04164 | 0.56595 | 0.40810 |
| Cu183 | 0.18188 | 0.70702 | 0.40806 |
| Cu184 | 0.37497 | 0.56595 | 0.05622 |
| Cu185 | 0.34855 | 0.70702 | 0.11487 |
| Cu186 | 0.51521 | 0.70702 | 0.05618 |
| Cu187 | 0.54164 | 0.56595 | 0.11482 |
| Cu188 | 0.37497 | 0.56595 | 0.17351 |
| Cu189 | 0.34855 | 0.70702 | 0.23216 |

---

---

|       |         |         |         |
|-------|---------|---------|---------|
| Cu190 | 0.51521 | 0.70702 | 0.17347 |
| Cu191 | 0.54164 | 0.56595 | 0.23212 |
| Cu192 | 0.37497 | 0.56595 | 0.29081 |
| Cu193 | 0.34855 | 0.70702 | 0.34946 |
| Cu194 | 0.51521 | 0.70702 | 0.29077 |
| Cu195 | 0.54164 | 0.56595 | 0.34941 |
| Cu196 | 0.37497 | 0.56595 | 0.40810 |
| Cu197 | 0.51521 | 0.70702 | 0.40806 |
| Cu198 | 0.70831 | 0.56595 | 0.05622 |
| Cu199 | 0.68188 | 0.70702 | 0.11487 |
| Cu200 | 0.84855 | 0.70702 | 0.05618 |
| Cu201 | 0.87497 | 0.56595 | 0.11482 |
| Cu202 | 0.70831 | 0.56595 | 0.17351 |
| Cu203 | 0.68188 | 0.70702 | 0.23216 |
| Cu204 | 0.84855 | 0.70702 | 0.17347 |
| Cu205 | 0.87497 | 0.56595 | 0.23212 |
| Cu206 | 0.70831 | 0.56595 | 0.29081 |
| Cu207 | 0.68188 | 0.70702 | 0.34946 |
| Cu208 | 0.84855 | 0.70702 | 0.29077 |
| Cu209 | 0.87497 | 0.56595 | 0.34941 |
| Cu210 | 0.70831 | 0.56595 | 0.40810 |
| Cu211 | 0.84855 | 0.70702 | 0.40806 |

---



---

|       |          |         |         |
|-------|----------|---------|---------|
| Cu212 | -0.01467 | 0.66867 | 0.48316 |
| Cu213 | 0.18204  | 0.55169 | 0.46542 |
| Cu214 | 0.33877  | 0.70063 | 0.45167 |
| Cu215 | 0.53143  | 0.58745 | 0.47573 |
| Cu216 | 0.74443  | 0.62975 | 0.49065 |
| Cu217 | 0.86715  | 0.54307 | 0.46918 |

---

**Table S6** Unit-cell and position parameters of the optimized model for the adsorption of HMF on Ni(OH)<sub>2</sub>

| <b>HMF@Ni(OH)<sub>2</sub></b> |          |          |          |
|-------------------------------|----------|----------|----------|
| a (Å)                         | 19.46900 |          |          |
| b (Å)                         | 15.48110 |          |          |
| c (Å)                         | 17.80660 |          |          |
| $\alpha$ (deg)                | 90.0     |          |          |
| $\beta$ (deg)                 | 90.0     |          |          |
| $\gamma$ (deg)                | 90.0     |          |          |
| <b>Atom<br/>Coordinates</b>   | <b>x</b> | <b>y</b> | <b>z</b> |
| H2                            | 0.95409  | 0.10000  | -0.11173 |
| H3                            | 0.90818  | 0.00000  | 0.11173  |
| H4                            | 0.95409  | 0.30000  | -0.11173 |
| H5                            | 0.90818  | 0.20000  | 0.11173  |
| H6                            | 0.95409  | 0.50000  | -0.11173 |
| H7                            | 0.90818  | 0.40000  | 0.11173  |
| H8                            | 0.95409  | 0.70000  | -0.11173 |
| H9                            | 0.90818  | 0.60000  | 0.11173  |
| H10                           | 0.95409  | 0.90000  | -0.11173 |
| H11                           | 0.90818  | 0.80000  | 0.11173  |
| H12                           | 0.95409  | 0.10000  | 0.13827  |

---

|     |         |         |         |
|-----|---------|---------|---------|
| H13 | 0.90818 | 0.00000 | 0.36173 |
| H14 | 0.95409 | 0.30000 | 0.13827 |
| H15 | 0.90818 | 0.20000 | 0.36173 |
| H16 | 0.95409 | 0.50000 | 0.13827 |
| H17 | 0.90818 | 0.40000 | 0.36173 |
| H18 | 0.95409 | 0.70000 | 0.13827 |
| H19 | 0.90818 | 0.60000 | 0.36173 |
| H20 | 0.95409 | 0.90000 | 0.13827 |
| H21 | 0.90818 | 0.80000 | 0.36173 |
| H22 | 0.95409 | 0.10000 | 0.38827 |
| H23 | 0.90818 | 0.00000 | 0.61173 |
| H24 | 0.95409 | 0.30000 | 0.38827 |
| H25 | 0.90818 | 0.20000 | 0.61173 |
| H26 | 0.95409 | 0.50000 | 0.38827 |
| H27 | 0.90818 | 0.40000 | 0.61173 |
| H28 | 0.95409 | 0.70000 | 0.38827 |
| H29 | 0.90818 | 0.60000 | 0.61173 |
| H30 | 0.95409 | 0.90000 | 0.38827 |
| H31 | 0.90818 | 0.80000 | 0.61173 |
| H32 | 0.95409 | 0.10000 | 0.63827 |
| H33 | 0.90818 | 0.00000 | 0.86173 |
| H34 | 0.95409 | 0.30000 | 0.63827 |

---

---

|     |         |          |          |
|-----|---------|----------|----------|
| H35 | 0.90818 | 0.20000  | 0.86173  |
| H36 | 0.95409 | 0.50000  | 0.63827  |
| H37 | 0.90818 | 0.40000  | 0.86173  |
| H38 | 0.95409 | 0.70000  | 0.63827  |
| H39 | 0.90818 | 0.60000  | 0.86173  |
| H40 | 0.95409 | 0.90000  | 0.63827  |
| H41 | 0.90818 | 0.80000  | 0.86173  |
| H42 | 0.76004 | 0.15302  | 0.04248  |
| H43 | 0.80357 | -0.03156 | -0.10349 |
| H44 | 0.76862 | 0.35905  | 0.05508  |
| H45 | 0.80522 | 0.16097  | -0.10598 |
| H46 | 0.74513 | 0.51806  | 0.05422  |
| H47 | 0.80196 | 0.36899  | -0.10140 |
| H48 | 0.76446 | 0.75740  | 0.04591  |
| H49 | 0.79644 | 0.60141  | -0.09305 |
| H50 | 0.76045 | 0.95210  | 0.04119  |
| H51 | 0.79467 | 0.79142  | -0.08972 |
| H52 | 0.76301 | 0.15720  | 0.29468  |
| H53 | 0.79405 | 0.00497  | 0.16116  |
| H54 | 0.76317 | 0.35095  | 0.30018  |
| H55 | 0.79631 | 0.20888  | 0.15759  |
| H56 | 0.76176 | 0.55257  | 0.29369  |

---

---

|     |         |          |         |
|-----|---------|----------|---------|
| H57 | 0.80172 | 0.42382  | 0.15053 |
| H58 | 0.75955 | 0.74856  | 0.30015 |
| H59 | 0.79744 | 0.60669  | 0.15510 |
| H60 | 0.76427 | 0.95469  | 0.30107 |
| H61 | 0.79417 | 0.80683  | 0.16113 |
| H62 | 0.76586 | 0.15458  | 0.55208 |
| H63 | 0.79204 | 0.00949  | 0.41602 |
| H64 | 0.80111 | 0.27084  | 0.60385 |
| H65 | 0.79797 | 0.20764  | 0.40609 |
| H66 | 0.78365 | 0.45473  | 0.59345 |
| H67 | 0.78399 | 0.40294  | 0.42734 |
| H68 | 0.76575 | 0.64343  | 0.55187 |
| H69 | 0.79816 | 0.61562  | 0.40409 |
| H70 | 0.76444 | 0.83257  | 0.54643 |
| H71 | 0.79979 | 0.80197  | 0.40337 |
| H72 | 0.75245 | 0.06959  | 0.81813 |
| H73 | 0.79624 | -0.00542 | 0.65679 |
| H74 | 0.76769 | 0.24700  | 0.81534 |
| H75 | 0.77683 | 0.19631  | 0.70300 |
| H76 | 0.76371 | 0.45104  | 0.80694 |
| H77 | 0.77883 | 0.39649  | 0.69661 |
| H78 | 0.75610 | 0.65772  | 0.78944 |

---

---

|       |         |         |         |
|-------|---------|---------|---------|
| H79   | 0.80234 | 0.58435 | 0.64985 |
| H80   | 0.76186 | 0.85077 | 0.80320 |
| H81   | 0.79703 | 0.79088 | 0.65597 |
| H82   | 0.42633 | 0.57972 | 0.61372 |
| H83   | 0.53060 | 0.65982 | 0.53641 |
| H84   | 0.64984 | 0.59425 | 0.47170 |
| H85   | 0.61012 | 0.51956 | 0.41028 |
| H86   | 0.39755 | 0.41329 | 0.64386 |
| H87   | 0.71320 | 0.48581 | 0.51871 |
| Ni88  | 0.86227 | 0.10000 | 0.00000 |
| Ni89  | 1.00000 | 0.00000 | 0.00000 |
| Ni90  | 0.86227 | 0.30000 | 0.00000 |
| Ni91  | 1.00000 | 0.20000 | 0.00000 |
| Ni92  | 0.86227 | 0.50000 | 0.00000 |
| Ni93  | 1.00000 | 0.40000 | 0.00000 |
| Ni94  | 0.86227 | 0.70000 | 0.00000 |
| Ni95  | 1.00000 | 0.60000 | 0.00000 |
| Ni96  | 0.86227 | 0.90000 | 0.00000 |
| Ni97  | 1.00000 | 0.80000 | 0.00000 |
| Ni98  | 0.86227 | 0.10000 | 0.25000 |
| Ni99  | 1.00000 | 0.00000 | 0.25000 |
| Ni100 | 0.86227 | 0.30000 | 0.25000 |

---

---

|       |         |         |         |
|-------|---------|---------|---------|
| Ni101 | 1.00000 | 0.20000 | 0.25000 |
| Ni102 | 0.86227 | 0.50000 | 0.25000 |
| Ni103 | 1.00000 | 0.40000 | 0.25000 |
| Ni104 | 0.86227 | 0.70000 | 0.25000 |
| Ni105 | 1.00000 | 0.60000 | 0.25000 |
| Ni106 | 0.86227 | 0.90000 | 0.25000 |
| Ni107 | 1.00000 | 0.80000 | 0.25000 |
| Ni108 | 0.86227 | 0.10000 | 0.50000 |
| Ni109 | 1.00000 | 0.00000 | 0.50000 |
| Ni110 | 0.86227 | 0.30000 | 0.50000 |
| Ni111 | 1.00000 | 0.20000 | 0.50000 |
| Ni112 | 0.86227 | 0.50000 | 0.50000 |
| Ni113 | 1.00000 | 0.40000 | 0.50000 |
| Ni114 | 0.86227 | 0.70000 | 0.50000 |
| Ni115 | 1.00000 | 0.60000 | 0.50000 |
| Ni116 | 0.86227 | 0.90000 | 0.50000 |
| Ni117 | 1.00000 | 0.80000 | 0.50000 |
| Ni118 | 0.86227 | 0.10000 | 0.75000 |
| Ni119 | 1.00000 | 0.00000 | 0.75000 |
| Ni120 | 0.86227 | 0.30000 | 0.75000 |
| Ni121 | 1.00000 | 0.20000 | 0.75000 |
| Ni122 | 0.86227 | 0.50000 | 0.75000 |

---

---

|       |         |         |          |
|-------|---------|---------|----------|
| Ni123 | 1.00000 | 0.40000 | 0.75000  |
| Ni124 | 0.86227 | 0.70000 | 0.75000  |
| Ni125 | 1.00000 | 0.60000 | 0.75000  |
| Ni126 | 0.86227 | 0.90000 | 0.75000  |
| Ni127 | 1.00000 | 0.80000 | 0.75000  |
| O128  | 0.95409 | 0.10000 | -0.05704 |
| O129  | 0.90818 | 0.00000 | 0.05704  |
| O130  | 0.95409 | 0.30000 | -0.05704 |
| O131  | 0.90818 | 0.20000 | 0.05704  |
| O132  | 0.95409 | 0.50000 | -0.05704 |
| O133  | 0.90818 | 0.40000 | 0.05704  |
| O134  | 0.95409 | 0.70000 | -0.05704 |
| O135  | 0.90818 | 0.60000 | 0.05704  |
| O136  | 0.95409 | 0.90000 | -0.05704 |
| O137  | 0.90818 | 0.80000 | 0.05704  |
| O138  | 0.95409 | 0.10000 | 0.19296  |
| O139  | 0.90818 | 0.00000 | 0.30704  |
| O140  | 0.95409 | 0.30000 | 0.19296  |
| O141  | 0.90818 | 0.20000 | 0.30704  |
| O142  | 0.95409 | 0.50000 | 0.19296  |
| O143  | 0.90818 | 0.40000 | 0.30704  |
| O144  | 0.95409 | 0.70000 | 0.19296  |

---



---

|      |         |         |         |
|------|---------|---------|---------|
| O145 | 0.90818 | 0.60000 | 0.30704 |
| O146 | 0.95409 | 0.90000 | 0.19296 |
| O147 | 0.90818 | 0.80000 | 0.30704 |
| O148 | 0.95409 | 0.10000 | 0.44296 |
| O149 | 0.90818 | 0.00000 | 0.55704 |
| O150 | 0.95409 | 0.30000 | 0.44296 |
| O151 | 0.90818 | 0.20000 | 0.55704 |
| O152 | 0.95409 | 0.50000 | 0.44296 |
| O153 | 0.90818 | 0.40000 | 0.55704 |
| O154 | 0.95409 | 0.70000 | 0.44296 |
| O155 | 0.90818 | 0.60000 | 0.55704 |
| O156 | 0.95409 | 0.90000 | 0.44296 |
| O157 | 0.90818 | 0.80000 | 0.55704 |
| O158 | 0.95409 | 0.10000 | 0.69296 |
| O159 | 0.90818 | 0.00000 | 0.80704 |
| O160 | 0.95409 | 0.30000 | 0.69296 |
| O161 | 0.90818 | 0.20000 | 0.80704 |
| O162 | 0.95409 | 0.50000 | 0.69296 |
| O163 | 0.90818 | 0.40000 | 0.80704 |
| O164 | 0.95409 | 0.70000 | 0.69296 |
| O165 | 0.90818 | 0.60000 | 0.80704 |
| O166 | 0.95409 | 0.90000 | 0.69296 |

---

---

|      |         |          |          |
|------|---------|----------|----------|
| O167 | 0.90818 | 0.80000  | 0.80704  |
| O168 | 0.78279 | 0.09884  | 0.05684  |
| O169 | 0.83354 | -0.01028 | -0.06213 |
| O170 | 0.78334 | 0.29743  | 0.05643  |
| O171 | 0.83328 | 0.18770  | -0.06222 |
| O172 | 0.78240 | 0.47935  | 0.06765  |
| O173 | 0.83381 | 0.39042  | -0.06230 |
| O174 | 0.78217 | 0.69840  | 0.05234  |
| O175 | 0.83792 | 0.59932  | -0.06232 |
| O176 | 0.78188 | 0.89622  | 0.05258  |
| O177 | 0.83813 | 0.79662  | -0.06264 |
| O178 | 0.78201 | 0.09886  | 0.30236  |
| O179 | 0.83773 | 0.00047  | 0.18788  |
| O180 | 0.78207 | 0.29207  | 0.30231  |
| O181 | 0.83815 | 0.20292  | 0.18772  |
| O182 | 0.78216 | 0.49534  | 0.30238  |
| O183 | 0.83785 | 0.40605  | 0.18785  |
| O184 | 0.78230 | 0.69278  | 0.30772  |
| O185 | 0.83801 | 0.60368  | 0.18753  |
| O186 | 0.78300 | 0.89613  | 0.30616  |
| O187 | 0.83778 | 0.80184  | 0.18783  |
| O188 | 0.78244 | 0.09446  | 0.55207  |

---

---

|      |         |          |         |
|------|---------|----------|---------|
| O189 | 0.83803 | 0.00440  | 0.43727 |
| O190 | 0.78609 | 0.30122  | 0.55780 |
| O191 | 0.84019 | 0.20242  | 0.43573 |
| O192 | 0.78227 | 0.51035  | 0.56745 |
| O193 | 0.83333 | 0.40071  | 0.43792 |
| O194 | 0.78216 | 0.70342  | 0.55242 |
| O195 | 0.83350 | 0.60415  | 0.44230 |
| O196 | 0.78225 | 0.89076  | 0.55761 |
| O197 | 0.84146 | 0.80089  | 0.43386 |
| O198 | 0.78224 | 0.12003  | 0.81764 |
| O199 | 0.83773 | -0.00076 | 0.68779 |
| O200 | 0.78264 | 0.30724  | 0.80726 |
| O201 | 0.82479 | 0.20391  | 0.68822 |
| O202 | 0.78211 | 0.50971  | 0.80271 |
| O203 | 0.82881 | 0.40099  | 0.69251 |
| O204 | 0.78257 | 0.70766  | 0.80690 |
| O205 | 0.83808 | 0.59873  | 0.68790 |
| O206 | 0.78455 | 0.90667  | 0.81064 |
| O207 | 0.83797 | 0.79711  | 0.68755 |
| O208 | 0.54175 | 0.44781  | 0.54153 |
| O209 | 0.67629 | 0.46310  | 0.48416 |
| O210 | 0.45839 | 0.31288  | 0.60931 |

---

---

|      |         |         |         |
|------|---------|---------|---------|
| C211 | 0.48245 | 0.46194 | 0.58217 |
| C212 | 0.46953 | 0.54996 | 0.58540 |
| C213 | 0.52323 | 0.59114 | 0.54527 |
| C214 | 0.56588 | 0.52650 | 0.51922 |
| C215 | 0.62798 | 0.52847 | 0.46871 |
| C216 | 0.44425 | 0.39033 | 0.61357 |

---

**Table S7** Unit-cell and position parameters of the optimized model for the adsorption of HMF on CuO-Ni(OH)<sub>2</sub> (1:3)

| <b>HMF@CuO-Ni(OH)<sub>2</sub></b> |          |          |          |
|-----------------------------------|----------|----------|----------|
| a (Å)                             | 14.32680 |          |          |
| b (Å)                             | 16.28090 |          |          |
| c (Å)                             | 27.78070 |          |          |
| α (deg)                           | 90.0     |          |          |
| β (deg)                           | 90.0     |          |          |
| γ (deg)                           | 90.0     |          |          |
| <b>Atom Coordinates</b>           | <b>x</b> | <b>y</b> | <b>z</b> |
| H2                                | 0.14897  | 0.09336  | 0.08552  |
| H3                                | 0.14897  | 0.09336  | 0.20282  |
| H4                                | 0.14897  | 0.25806  | 0.14417  |
| H5                                | -0.14897 | 0.14826  | 0.14417  |
| H6                                | 0.14897  | 0.09336  | 0.32011  |
| H7                                | 0.14897  | 0.25806  | 0.26146  |
| H8                                | -0.14897 | 0.14826  | 0.26146  |
| H9                                | 0.14897  | 0.25806  | 0.37876  |
| H10                               | -0.14897 | 0.14826  | 0.37876  |
| H11                               | 0.48230  | 0.09336  | 0.08552  |
| H12                               | 0.48230  | 0.09336  | 0.20282  |

---

|     |          |         |         |
|-----|----------|---------|---------|
| H13 | 0.48230  | 0.25806 | 0.14417 |
| H14 | 0.18437  | 0.14826 | 0.14417 |
| H15 | 0.48230  | 0.09336 | 0.32011 |
| H16 | 0.48230  | 0.25806 | 0.26146 |
| H17 | 0.18437  | 0.14826 | 0.26146 |
| H18 | 0.48230  | 0.25806 | 0.37876 |
| H19 | 0.18437  | 0.14826 | 0.37876 |
| H20 | 0.81563  | 0.09336 | 0.08552 |
| H21 | 0.81563  | 0.09336 | 0.20282 |
| H22 | 0.81563  | 0.25806 | 0.14417 |
| H23 | 0.51770  | 0.14826 | 0.14417 |
| H24 | 0.81563  | 0.09336 | 0.32011 |
| H25 | 0.81563  | 0.25806 | 0.26146 |
| H26 | 0.51770  | 0.14826 | 0.26146 |
| H27 | 0.81563  | 0.25806 | 0.37876 |
| H28 | 0.51770  | 0.14826 | 0.37876 |
| H29 | 0.14897  | 0.09336 | 0.43741 |
| H30 | 0.48230  | 0.09336 | 0.43741 |
| H31 | 0.81563  | 0.09336 | 0.43741 |
| H32 | -0.09072 | 0.33478 | 0.05686 |
| H33 | -0.11354 | 0.37847 | 0.18883 |
| H34 | -0.11382 | 0.39556 | 0.30221 |

---

---

|      |          |         |         |
|------|----------|---------|---------|
| H35  | 0.22832  | 0.32835 | 0.05903 |
| H36  | 0.21337  | 0.35952 | 0.19338 |
| H37  | 0.22457  | 0.38369 | 0.30920 |
| H38  | 0.56559  | 0.33476 | 0.06202 |
| H39  | 0.54989  | 0.35939 | 0.19617 |
| H40  | 0.54466  | 0.37204 | 0.30455 |
| H41  | 0.15992  | 0.31297 | 0.47850 |
| H42  | -0.11433 | 0.15596 | 0.49487 |
| H43  | -0.10506 | 0.38992 | 0.42754 |
| H44  | 0.46408  | 0.25965 | 0.48299 |
| H45  | 0.18431  | 0.17569 | 0.47145 |
| H46  | 0.22524  | 0.42262 | 0.42017 |
| H47  | 0.81181  | 0.26264 | 0.47614 |
| H48  | 0.55581  | 0.14197 | 0.49096 |
| H49  | 0.54068  | 0.34365 | 0.43501 |
| H50  | 0.30026  | 0.36034 | 0.72986 |
| H51  | 0.42481  | 0.45464 | 0.67892 |
| H52  | 0.43040  | 0.50360 | 0.58728 |
| H53  | 0.31697  | 0.54534 | 0.57915 |
| H54  | 0.14001  | 0.28166 | 0.70505 |
| H55  | 0.33778  | 0.49952 | 0.51133 |
| Ni56 | 0.00000  | 0.20316 | 0.08552 |

---

---

|      |         |         |         |
|------|---------|---------|---------|
| Ni57 | 0.00000 | 0.20316 | 0.20282 |
| Ni58 | 0.00000 | 0.20316 | 0.32011 |
| Ni59 | 0.33333 | 0.20316 | 0.08552 |
| Ni60 | 0.33333 | 0.20316 | 0.20282 |
| Ni61 | 0.33333 | 0.20316 | 0.32011 |
| Ni62 | 0.66667 | 0.20316 | 0.08552 |
| Ni63 | 0.66667 | 0.20316 | 0.20282 |
| Ni64 | 0.66667 | 0.20316 | 0.32011 |
| Ni65 | 0.00000 | 0.20316 | 0.43741 |
| Ni66 | 0.33333 | 0.20316 | 0.43741 |
| Ni67 | 0.66667 | 0.20316 | 0.43741 |
| Ni68 | 0.00625 | 0.38022 | 0.12804 |
| Ni69 | 0.01261 | 0.38549 | 0.24380 |
| Ni70 | 0.01240 | 0.38538 | 0.35637 |
| Ni71 | 0.33122 | 0.37501 | 0.12811 |
| Ni72 | 0.34374 | 0.38531 | 0.24679 |
| Ni73 | 0.35623 | 0.39581 | 0.36246 |
| Ni74 | 0.66879 | 0.37508 | 0.13418 |
| Ni75 | 0.68110 | 0.38534 | 0.25010 |
| Ni76 | 0.62489 | 0.41127 | 0.37182 |
| Ni77 | 0.04982 | 0.42183 | 0.45009 |
| Ni78 | 0.36888 | 0.39496 | 0.46259 |

---



---

|      |          |         |         |
|------|----------|---------|---------|
| Ni79 | 0.70630  | 0.38009 | 0.45015 |
| O80  | 0.07605  | 0.09336 | 0.08552 |
| O81  | 0.11171  | 0.63650 | 0.13505 |
| O82  | 0.27838  | 0.63650 | 0.03600 |
| O83  | 0.07605  | 0.09336 | 0.20282 |
| O84  | 0.07605  | 0.25806 | 0.14417 |
| O85  | -0.07605 | 0.14826 | 0.14417 |
| O86  | 0.11171  | 0.63650 | 0.25234 |
| O87  | 0.27838  | 0.63650 | 0.15329 |
| O88  | 0.07605  | 0.09336 | 0.32011 |
| O89  | 0.07605  | 0.25806 | 0.26146 |
| O90  | -0.07605 | 0.14826 | 0.26146 |
| O91  | 0.11171  | 0.63650 | 0.36964 |
| O92  | 0.27838  | 0.63650 | 0.27059 |
| O93  | 0.07605  | 0.25806 | 0.37876 |
| O94  | -0.07605 | 0.14826 | 0.37876 |
| O95  | 0.27838  | 0.63650 | 0.38788 |
| O96  | 0.40938  | 0.09336 | 0.08552 |
| O97  | 0.44504  | 0.63650 | 0.13505 |
| O98  | 0.61171  | 0.63650 | 0.03600 |
| O99  | 0.40938  | 0.09336 | 0.20282 |
| O100 | 0.40938  | 0.25806 | 0.14417 |

---

---

|      |         |         |         |
|------|---------|---------|---------|
| O101 | 0.25729 | 0.14826 | 0.14417 |
| O102 | 0.44504 | 0.63650 | 0.25234 |
| O103 | 0.61171 | 0.63650 | 0.15329 |
| O104 | 0.40938 | 0.09336 | 0.32011 |
| O105 | 0.40938 | 0.25806 | 0.26146 |
| O106 | 0.25729 | 0.14826 | 0.26146 |
| O107 | 0.44504 | 0.63650 | 0.36964 |
| O108 | 0.61171 | 0.63650 | 0.27059 |
| O109 | 0.40938 | 0.25806 | 0.37876 |
| O110 | 0.25729 | 0.14826 | 0.37876 |
| O111 | 0.61171 | 0.63650 | 0.38788 |
| O112 | 0.74272 | 0.09336 | 0.08552 |
| O113 | 0.77838 | 0.63650 | 0.13505 |
| O114 | 0.94504 | 0.63650 | 0.03600 |
| O115 | 0.74272 | 0.09336 | 0.20282 |
| O116 | 0.74272 | 0.25806 | 0.14417 |
| O117 | 0.59062 | 0.14826 | 0.14417 |
| O118 | 0.77838 | 0.63650 | 0.25234 |
| O119 | 0.94504 | 0.63650 | 0.15329 |
| O120 | 0.74272 | 0.09336 | 0.32011 |
| O121 | 0.74272 | 0.25806 | 0.26146 |
| O122 | 0.59062 | 0.14826 | 0.26146 |

---

---

|      |          |         |         |
|------|----------|---------|---------|
| O123 | 0.77838  | 0.63650 | 0.36964 |
| O124 | 0.94504  | 0.63650 | 0.27059 |
| O125 | 0.74272  | 0.25806 | 0.37876 |
| O126 | 0.59062  | 0.14826 | 0.37876 |
| O127 | 0.94504  | 0.63650 | 0.38788 |
| O128 | 0.07605  | 0.09336 | 0.43741 |
| O129 | 0.40938  | 0.09336 | 0.43741 |
| O130 | 0.74272  | 0.09336 | 0.43741 |
| O131 | -0.03777 | 0.31273 | 0.07467 |
| O132 | 0.14984  | 0.51104 | 0.06298 |
| O133 | 0.31816  | 0.48522 | 0.11228 |
| O134 | -0.05661 | 0.34435 | 0.18749 |
| O135 | 0.14918  | 0.50092 | 0.18446 |
| O136 | 0.31850  | 0.49563 | 0.22814 |
| O137 | -0.06244 | 0.35418 | 0.29998 |
| O138 | 0.14429  | 0.49521 | 0.30652 |
| O139 | 0.31881  | 0.50493 | 0.34421 |
| O140 | 0.28846  | 0.31188 | 0.07225 |
| O141 | 0.48177  | 0.51083 | 0.06280 |
| O142 | 0.65016  | 0.48492 | 0.11265 |
| O143 | 0.27525  | 0.33371 | 0.19060 |
| O144 | 0.48169  | 0.50427 | 0.18463 |

---

---

|      |          |         |         |
|------|----------|---------|---------|
| O145 | 0.65060  | 0.49479 | 0.22800 |
| O146 | 0.28158  | 0.34941 | 0.30641 |
| O147 | 0.47539  | 0.49503 | 0.30641 |
| O148 | 0.64895  | 0.50400 | 0.34054 |
| O149 | 0.61982  | 0.31223 | 0.07843 |
| O150 | 0.81664  | 0.51150 | 0.06277 |
| O151 | 0.98694  | 0.48974 | 0.10955 |
| O152 | 0.61175  | 0.33336 | 0.19435 |
| O153 | 0.81894  | 0.50473 | 0.18174 |
| O154 | 0.98726  | 0.49945 | 0.22809 |
| O155 | 0.60671  | 0.34947 | 0.31242 |
| O156 | 0.81426  | 0.50014 | 0.30339 |
| O157 | 0.98186  | 0.49979 | 0.34362 |
| O158 | 0.09478  | 0.32324 | 0.46889 |
| O159 | -0.08859 | 0.20871 | 0.48521 |
| O160 | -0.04490 | 0.35951 | 0.41859 |
| O161 | 0.14919  | 0.49979 | 0.44059 |
| O162 | 0.10611  | 0.68291 | 0.46871 |
| O163 | 0.33120  | 0.58445 | 0.48066 |
| O164 | 0.39961  | 0.28143 | 0.47802 |
| O165 | 0.23859  | 0.20848 | 0.48084 |
| O166 | 0.26985  | 0.37563 | 0.41588 |

---

---

|       |         |         |         |
|-------|---------|---------|---------|
| O167  | 0.44375 | 0.46376 | 0.42488 |
| O168  | 0.58051 | 0.62956 | 0.49072 |
| O169  | 0.64198 | 0.47168 | 0.43017 |
| O170  | 0.74377 | 0.28080 | 0.47503 |
| O171  | 0.58039 | 0.19749 | 0.48715 |
| O172  | 0.59889 | 0.32749 | 0.41882 |
| O173  | 0.81176 | 0.43672 | 0.45016 |
| O174  | 0.84350 | 0.66113 | 0.48122 |
| O175  | 0.97620 | 0.51103 | 0.45918 |
| O176  | 0.24030 | 0.39593 | 0.61692 |
| O177  | 0.34912 | 0.44970 | 0.53276 |
| O178  | 0.09702 | 0.27620 | 0.63480 |
| Cu179 | 0.04164 | 0.56595 | 0.05622 |
| Cu180 | 0.01521 | 0.70702 | 0.11487 |
| Cu181 | 0.18188 | 0.70702 | 0.05618 |
| Cu182 | 0.20831 | 0.56595 | 0.11482 |
| Cu183 | 0.04164 | 0.56595 | 0.17351 |
| Cu184 | 0.01521 | 0.70702 | 0.23216 |
| Cu185 | 0.18188 | 0.70702 | 0.17347 |
| Cu186 | 0.20831 | 0.56595 | 0.23212 |
| Cu187 | 0.04164 | 0.56595 | 0.29081 |
| Cu188 | 0.01521 | 0.70702 | 0.34946 |

---

---

|       |         |         |         |
|-------|---------|---------|---------|
| Cu189 | 0.18188 | 0.70702 | 0.29077 |
| Cu190 | 0.20831 | 0.56595 | 0.34941 |
| Cu191 | 0.04164 | 0.56595 | 0.40810 |
| Cu192 | 0.18188 | 0.70702 | 0.40806 |
| Cu193 | 0.37497 | 0.56595 | 0.05622 |
| Cu194 | 0.34855 | 0.70702 | 0.11487 |
| Cu195 | 0.51521 | 0.70702 | 0.05618 |
| Cu196 | 0.54164 | 0.56595 | 0.11482 |
| Cu197 | 0.37497 | 0.56595 | 0.17351 |
| Cu198 | 0.34855 | 0.70702 | 0.23216 |
| Cu199 | 0.51521 | 0.70702 | 0.17347 |
| Cu200 | 0.54164 | 0.56595 | 0.23212 |
| Cu201 | 0.37497 | 0.56595 | 0.29081 |
| Cu202 | 0.34855 | 0.70702 | 0.34946 |
| Cu203 | 0.51521 | 0.70702 | 0.29077 |
| Cu204 | 0.54164 | 0.56595 | 0.34941 |
| Cu205 | 0.37497 | 0.56595 | 0.40810 |
| Cu206 | 0.51521 | 0.70702 | 0.40806 |
| Cu207 | 0.70831 | 0.56595 | 0.05622 |
| Cu208 | 0.68188 | 0.70702 | 0.11487 |
| Cu209 | 0.84855 | 0.70702 | 0.05618 |
| Cu210 | 0.87497 | 0.56595 | 0.11482 |

---

---

|       |          |         |         |
|-------|----------|---------|---------|
| Cu211 | 0.70831  | 0.56595 | 0.17351 |
| Cu212 | 0.68188  | 0.70702 | 0.23216 |
| Cu213 | 0.84855  | 0.70702 | 0.17347 |
| Cu214 | 0.87497  | 0.56595 | 0.23212 |
| Cu215 | 0.70831  | 0.56595 | 0.29081 |
| Cu216 | 0.68188  | 0.70702 | 0.34946 |
| Cu217 | 0.84855  | 0.70702 | 0.29077 |
| Cu218 | 0.87497  | 0.56595 | 0.34941 |
| Cu219 | 0.70831  | 0.56595 | 0.40810 |
| Cu220 | 0.84855  | 0.70702 | 0.40806 |
| Cu221 | -0.02324 | 0.67833 | 0.47849 |
| Cu222 | 0.19569  | 0.59540 | 0.47574 |
| Cu223 | 0.44739  | 0.63685 | 0.48928 |
| Cu224 | 0.53719  | 0.52676 | 0.46011 |
| Cu225 | 0.71033  | 0.65042 | 0.48747 |
| Cu226 | 0.84333  | 0.54186 | 0.46854 |
| C227  | 0.22410  | 0.35975 | 0.66117 |
| C228  | 0.29526  | 0.38009 | 0.69267 |
| C229  | 0.35953  | 0.42862 | 0.66633 |
| C230  | 0.32364  | 0.43634 | 0.62049 |
| C231  | 0.35708  | 0.48725 | 0.57951 |
| C232  | 0.14766  | 0.30225 | 0.66707 |

---

## References

- 1 A. P. Abbott, D. Boothby, G. Capper, D. L. Davies and R. K. Rasheed, *J. Am. Chem. Soc.*, 2004, **126**, 9142–9147.
- 2 P. Hohenberg and W. Kohn, *Phys. Rev.*, 1964, **136**, B864–B871.
- 3 W. Kohn and L. J. Sham, *Phys. Rev.*, 1965, **140**, A1133–A1138.
- 4 J. VandeVondele, M. Krack, F. Mohamed, M. Parrinello, T. Chassaing and J. Hutter, *Comput. Phys. Commun.*, 2005, **167**, 103–128.
- 5 S. Goedecker, M. Teter and J. Hutter, *Phys. Rev. B*, 1996, **54**, 1703–1710.
- 6 C. Hartwigsen, S. Goedecker and J. Hutter, *Phys. Rev. B*, 1998, **58**, 3641–3662.
- 7 M. Krack and M. Parrinello, *Phys. Chem. Chem. Phys.*, 2000, **2**, 2105–2112.
- 8 J. VandeVondele and J. Hutter, *J. Chem. Phys.*, 2007, **127**, 114105.
- 9 J. P. Perdew, K. Burke and M. Ernzerhof, *Phys. Rev. Lett.*, 1996, **77**, 3865–3868.
- 10 S. Grimme, J. Antony, S. Ehrlich and H. Krieg, *J. Chem. Phys.*, 2010, **132**, 154104.
- 11 P. Zhou, X. Lv, S. Tao, J. Wu, H. Wang, X. Wei, T. Wang, B. Zhou, Y. Lu, T. Frauenheim, X. Fu, S. Wang and Y. Zou, *Adv. Mater.*, 2022, **34**, 2204089.
- 12 X. Pang, H. Bai, H. Zhao, W. Fan and W. Shi, *ACS Catal.*, 2022, **12**, 1545–1557.
- 13 J. Zhang, P. Yu, G. Zeng, F. Bao, Y. Yuan and H. Huang, *J. Mater. Chem. A*, 2021, **9**, 9685–9691.
- 14 B. Zhang, Z. Yang, C. Yan, Z. Xue and T. Mu, *Small*, 2023, **19**, 2207236.
- 15 Y. Huang, X. Pang, J. Cui, Z. Huang, G. Wang, H. Zhao, H. Bai and W. Fan, *Inorg. Chem.*, 2023, **62**, 6499–6509.
- 16 X. Lu, K. H. Wu, B. Zhang, J. Chen, F. Li, B. J. Su, P. Yan, J. M. Chen and W. Qi, *Angew. Chem. Int. Ed.*, 2021, **60**, 14528–14535.
- 17 P. Zhou, G. Hai, G. Zhao, R. Li, X. Huang, Y. Lu and G. Wang, *Appl. Catal. B*, 2023, **325**, 122364.
- 18 H. Xu, J. Bi, T. Sang, W. Wang, J. Hao and Z. Li, *Chem. Commun.*, 2023, **59**, 8440–8443.
- 19 B. Zhang, H. Fu and T. Mu, *Green Chem.*, 2022, **24**, 877–884.
- 20 C. Liu, X. R. Shi, K. Yue, P. Wang, K. Zhan, X. Wang, B. Y. Xia and Y. Yan, *Adv. Mater.*, 2023, **35**, 2211177.
- 21 X. Pang, H. Zhao, Y. Huang, Y. Liu, H. Bai, W. Fan and W. Shi, *Inorg Chem*, 2022, **61**, 8940–8954.
- 22 T. Wu, Z. Xu, X. Wang, M. Luo, Y. Xia, X. Zhang, J. Li, J. Liu, J. Wang, H.-L. Wang and F. Huang, *Appl. Catal. B*, 2023, **323**, 122126.
- 23 L. Zeng, Y. Chen, M. Sun, Q. Huang, K. Sun, J. Ma, J. Li, H. Tan, M. Li, Y. Pan, Y. Liu, M. Luo, B. Huang and S. Guo, *J. Am. Chem. Soc.*, 2023, **145**, 17495–18160.
- 24 Y. Wu, L. Ma, J. Wu, M. Song, C. Wang and J. Lu, *Adv. Mater.*, 2024, 2311698.
- 25 C. Wang, H.-J. Bongard, C. Weidenthaler, Y. Wu and F. Schüth, *Chem. Mater.*, 2022, **34**, 3123–3132.
- 26 D. Liu, Y. Li, C. Wang, H. Yang, R. Wang, S. Li and X. Yang, *Appl. Catal. A*, 2024, **669**, 119497.



- 27 X. Huang, J. Song, M. Hua, Z. Xie, S. Liu, T. Wu, G. Yang and B. Han, *Green Chem.*, 2020, **22**, 843–849.
- 28 Y. Zhang, Z. Xue, X. Zhao, B. Zhang and T. Mu, *Green Chem.*, 2022, **24**, 1721–1731.
- 29 Y. Zhong, R.-Q. Ren, L. Qin, J.-B. Wang, Y.-Y. Peng, Q. Li and Y.-M. Fan, *New J. Chem.*, 2021, **45**, 11213–11221.
- 30 Y. Lu, C. Dong, Y. Huang, Y. Zou, Z. Liu, Y. Liu, Y. Li, N. He, J. Shi and S. Wang, *Angew. Chem. Int. Ed.*, 2020, **59**, 19215–19221.
